# Supplementary material for: Turmeric Powder Counteracts Oxidative Stress and Reduces AFB1 Content in the Liver of Broilers Exposed to the EU Maximum Levels of the Mycotoxin
Source: MDPI journal article supplement (doi:10.3390/toxins15120687), 2023-12-07
Supplement: s1 [file s1]

**Table S1.** Primers for Quantitative Real-Time PCR (qRT-PCR).

| Gene   | Accession no.  | Sequence                                                   | Annealing temperature (°C) | Amplicon size (bp) |
|--------|----------------|------------------------------------------------------------|----------------------------|--------------------|
| CYP1A1 | NM_205147.1    | FW: GATGTCCGCGTCCAACCC<br>REV: GCGGTTGTACGGTGTCAA          | 65                         | 86                 |
| CYP1A2 | NM_205146.2    | FW: CGCAGATCCCAAACGAGAAG<br>REV: GCGGTTGTACGGTGTCAA        | 62                         | 76                 |
| CYP2A6 | KX687985       | FW: CCCTCTCCTAAACAGATGCG<br>REV: TTGCTGTCTCCCATCCTGC       | 64                         | 149                |
| CYP2H1 | NM_001001616.1 | FW: TCCTTCCCCTTAATGTTCCACA<br>REV: GGGAGACAGCAAAGGGAATATC  | 62                         | 98                 |
| CYP3A4 | NM_001329508.2 | FW: TGGTAGTCATGATCCAGCC<br>REV: GGGGTCAATGTTCTCTCCGT       | 66                         | 113                |
| EPHX1  | XM_419386.6    | FW: TCCTCAATGCGTTTCTACAAAGA<br>REV: TCATTAGGAAAGGAGGCAATGC | 63                         | 107                |
| EPHX2  | NM_001033645.1 | FW: CAAGGGCATGGAGGAGTGG<br>REV: GCCTCTCCATTTGTGTCCAA       | 66                         | 80                 |
| GSTA1  | NM_001001777.1 | FW: TTTTAGCGGTGGAAGAGTCG<br>REV: GGGGATATTGCTTGTCTTGCT     | 62                         | 86                 |
| GSTA2  | NM_001001776.1 | FW: AGCAGCCGATGTGAAAGAAAA<br>REV: GCCAACAAGATAATCCTGACCA   | 62                         | 115                |
| GSTA4  | XM_015284816.2 | FW: AGAGAGCCCTGATCGACATG<br>REV: CTCTCTGTTGCCTTCTCTGC      | 62                         | 130                |
| GSTM2  | NM_205090.1    | FW: CAACCTGAGCCAATTCCTGC<br>REV: GCGCCGTGTACCAGAAAAT       | 66                         | 104                |
| Nrf2   | NM_205117      | FW: AATCAAACCTCAGCCACCCAG<br>REV: CAGCCAGGTTGTCGTTTTCA     | 64                         | 142                |
| CAT    | NM_001031215.2 | FW: GGCAGTCTGGACAAATACA<br>REV: AAGTGGCTTGCCTGTATGTC       | 61                         | 71                 |
| GPX1   | NM_001277853.2 | FW: TTCGGGCACCAGGAGAACGC<br>REV: TGGTGAAGTTGGGTTTGAAGC     | 66                         | 91                 |
| SOD1   | NM_205064.1    | FW: GGGAGGAGTGGCAGAAGTAG<br>REV: CCCTCTACCCAGGTCATCAC      | 63                         | 115                |
| SOD2   | NM_204211.1    | FW: GGAGCAGGGACGTCTACAAA<br>REV: CCCAGCAATGGAATGAGACC      | 62                         | 81                 |
| ABCB1  | NM_204894.1    | FW: ACAACAGTCGGGAGGTGTC<br>REV: GCTGTGTTCCCTTGTCTCCT       | 62                         | 123                |
| ABCC2  | XM_015288821.2 | FW: TCCTTGTTCTTTGTCAACCACA<br>REV: AGTAGGCAGACACGCGATAA    | 64                         | 122                |
| ABCG2  | NM_001328490.1 | FW: TCCTTGTTCTTTGTCAACCACA<br>REV: AGTAGGCAGACACGCGATAA    | 62                         | 124                |
| PGK2   | NM_204985.2    | FW: CTGCTGGCTTCCTGATGAA<br>REV: TCCTGAACTTTAGCTCCTCCA      | 62                         | 103                |
| RPS7   | XM_001234708.4 | FW: GCCCAAGCCAACGAGAAAA<br>REV: TTTACGCGGATTCTCTTGCC       | 65                         | 138                |
| GUSB   | NM_001039316.2 | FW: TGATTGGGGAACATCTGGA<br>REV: CGTTGGCGGGTAAATATTCCT      | 62                         | 97                 |
| HPRT   | NM_204848.1    | FW: ACGTTGCTGTCTCTACTTAAGC<br>REV: CCCACACTTCGAGGAGTTCT    | 61                         | 86                 |

*Italicized gene names indicate the internal control genes used as references.*

**Table S2.** Matrix-matched regression curves and related R<sup>2</sup> and SSE (%) values

| Toxins | Calibration range | n° exp. points | Matrix-matched calibration curve | R <sup>2</sup> | SSE (%) |
|--------|-------------------|----------------|----------------------------------|----------------|---------|
| AFB1   | 0.05-5 ng/mL      | 5              | $y=6.12x-0.04$                   | 0.999          | 103     |
| AFB2   |                   |                | $y=22.49x+0.09$                  | 0.999          | 98      |
| AFG1   |                   |                | $y=2.18x+0.06$                   | 0.999          | 91      |
| AFG2   |                   |                | $y=10.45x+0.12$                  | 0.999          | 96      |
| AFM1   |                   |                | $y=2.44x+0.03$                   | 0.999          | 96      |
| AFM2   |                   |                | $y=2.58x+0.08$                   | 0.999          | 93      |
| AFQ1   |                   |                | $y=0.41x-0.02$                   | 0.999          | 90      |
| AFL    |                   |                | $y=1.50x+0.01$                   | 0.998          | 107     |

SSE(%) = signal suppression/enhancement (matrix calibration line slope/standard calibration line slope \*100).

**Table S3.** Limit of detection (LOD, S/N=3) and limit of quantification (LOQ, S/N = 10) calculated for AFB1, AFB2, AFG1, AFG2, AFM1, AFM2, AFQ1 and AFL in liver samples.

|     | AF concentration (ng/Kg) |      |      |      |      |      |      |     |
|-----|--------------------------|------|------|------|------|------|------|-----|
|     | AFB1                     | AFB2 | AFG1 | AFG2 | AFM1 | AFM2 | AFQ1 | AFL |
| LOD | 8                        | 2    | 17   | 5    | 17   | 13   | 24   | 30  |
| LOQ | 25                       | 5    | 80   | 16   | 57   | 42   | 80   | 99  |

**Table S4.** Recoveries of AFB1, AFB2, AFG1, AFG2, AFM1, AFM2, AFQ1 and AFL in liver samples spiked at 2 different AFBs levels (0.1 and 1 ng/g).

| Spiking level<br>(ng/Kg) | Recovery, % (RSD, %, n=3) |        |        |        |        |        |        |        |
|--------------------------|---------------------------|--------|--------|--------|--------|--------|--------|--------|
|                          | AFB1                      | AFB2   | AFG1   | AFG2   | AFM1   | AFM2   | AFQ1   | AFL    |
| 1000                     | 87 (7)                    | 92 (7) | 99 (9) | 85 (9) | 91 (9) | 20 (3) | 29 (8) | 90 (7) |
| 100                      | 90 (1)                    | 89 (2) | 93 (7) | 73 (2) | 83 (3) | <LOD   | <LOD   | 93 (7) |

Determination of AF was performed using the optimized analytical method and quantification was performed using the standard calibration line. RSD = relative standard deviation.
