# Supplementary material for: Turmeric Powder Counteracts Oxidative Stress and Reduces AFB1 Content in the Liver of Broilers Exposed to the EU Maximum Levels of the Mycotoxin
Source: MDPI journal article supplement (doi:10.3390/toxins15120687), 2023-12-07
Supplement: s1 [file s1]

**Figure S1.** qRT-PCR dissociation curves for each gene in liver (L) and intestine (I).

## Dissociation Curve

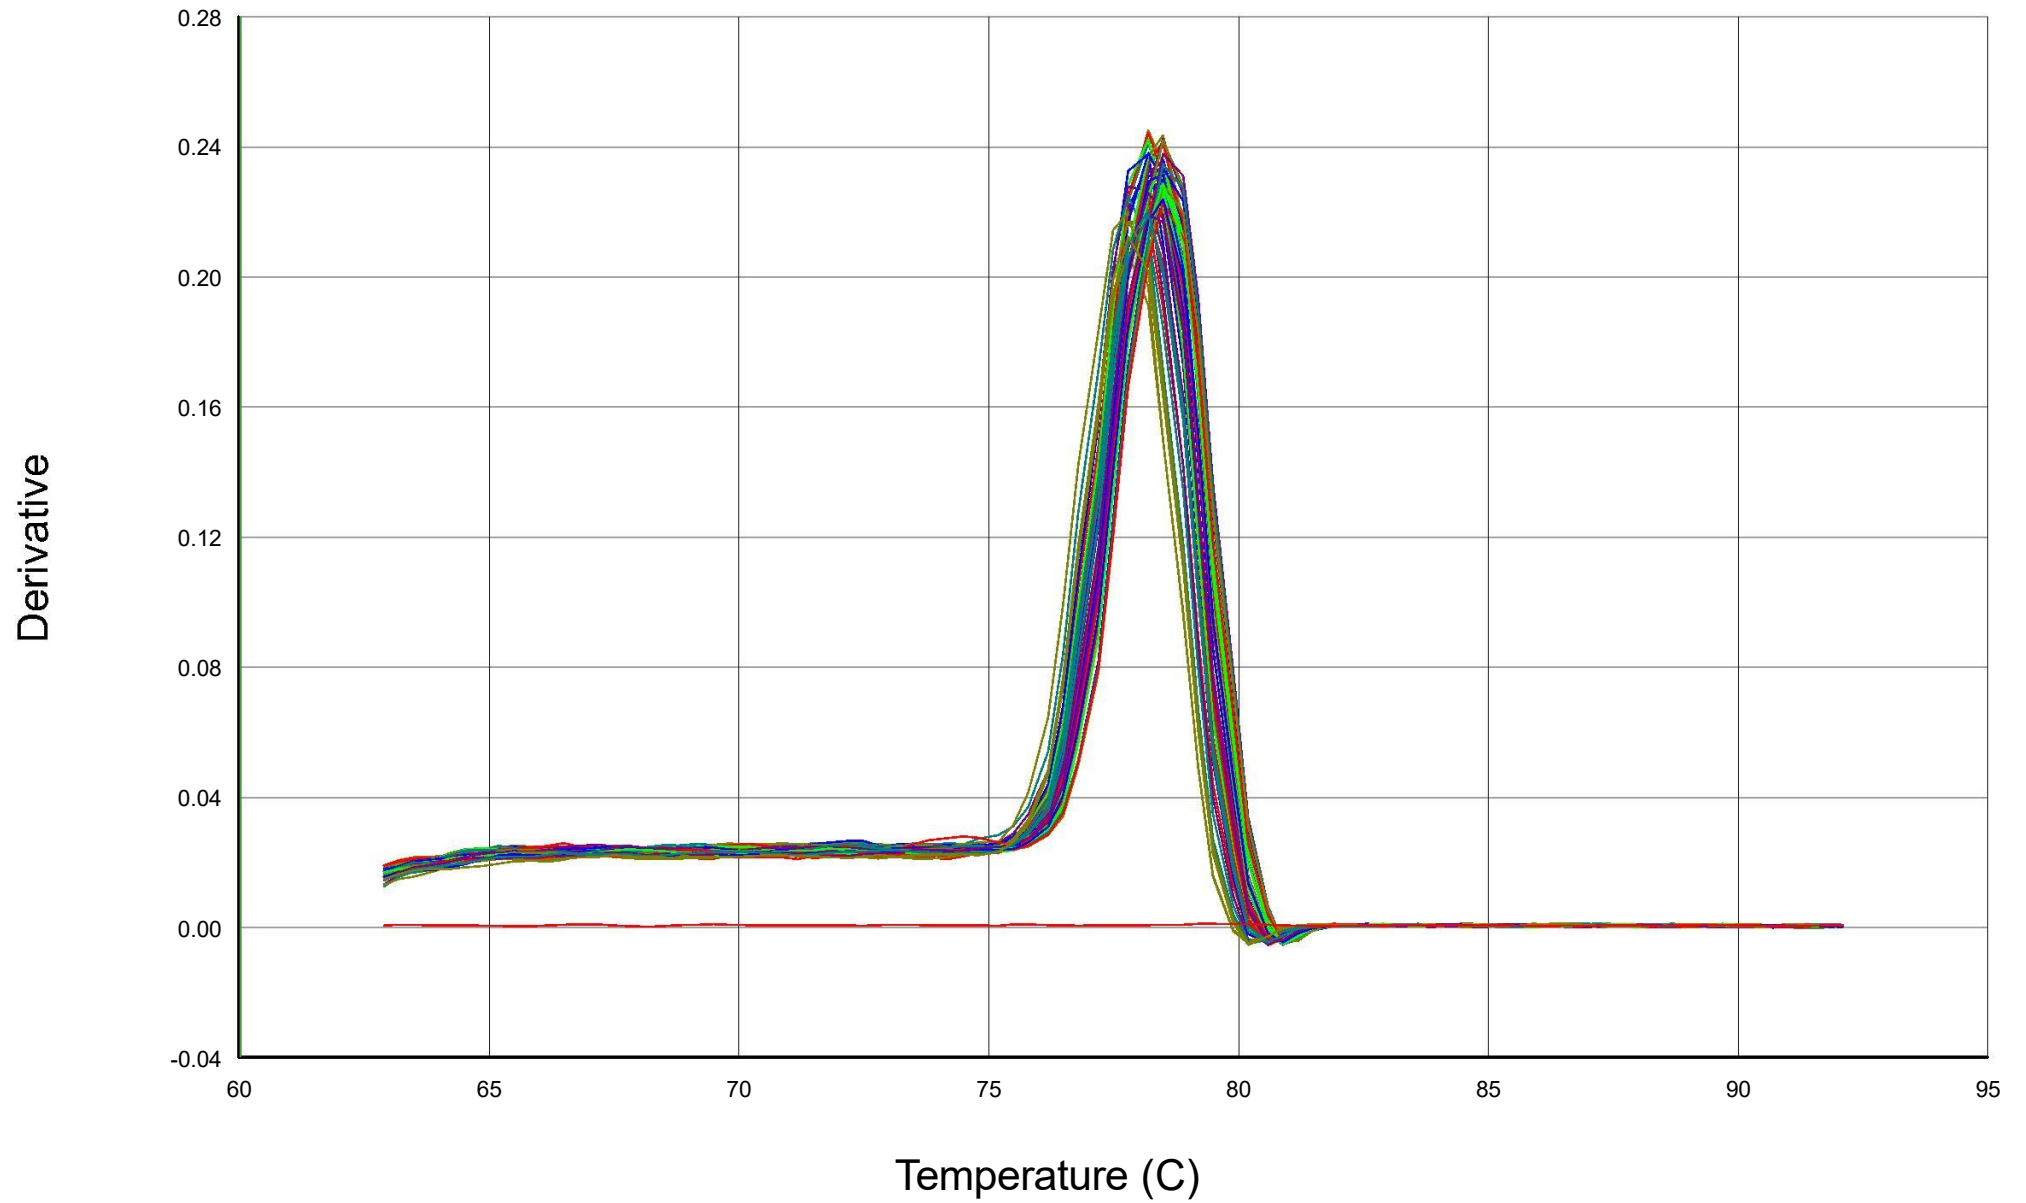

Detector = ABCG2\_Chicken, T<sub>m</sub> = 60.0 °C

Well(s): A1-D12,H7-H8

Document: L\_Broiler\_ABCG2\_plate 1 (Absolute Quantification)

## Dissociation Curve

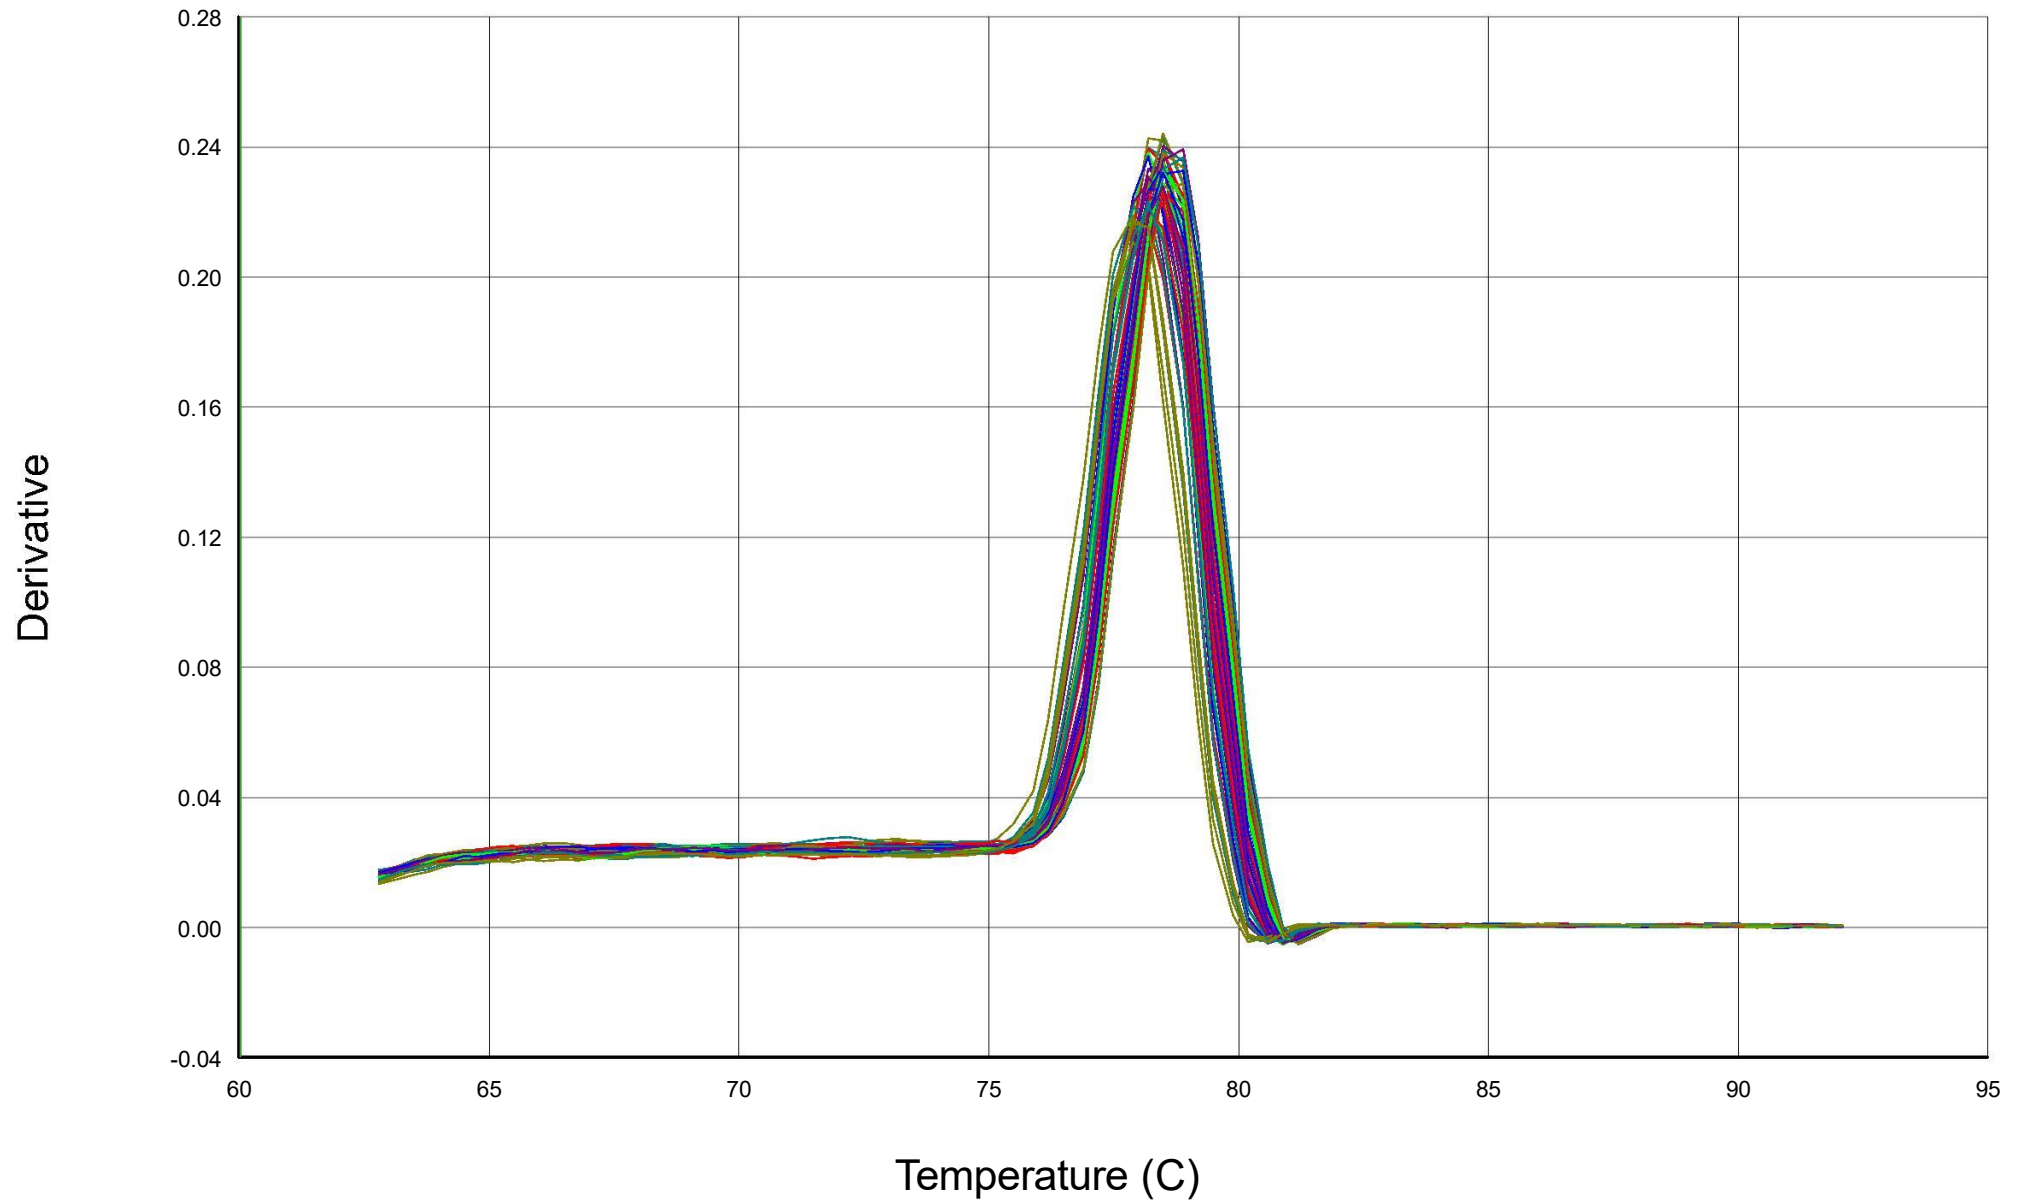

Detector = ABCG2\_Chicken, T<sub>m</sub> = 60.0 °C

Well(s): A1-D12

Document: L\_Broiler\_ABCG2\_plate 2 (Absolute Quantification)

## Dissociation Curve

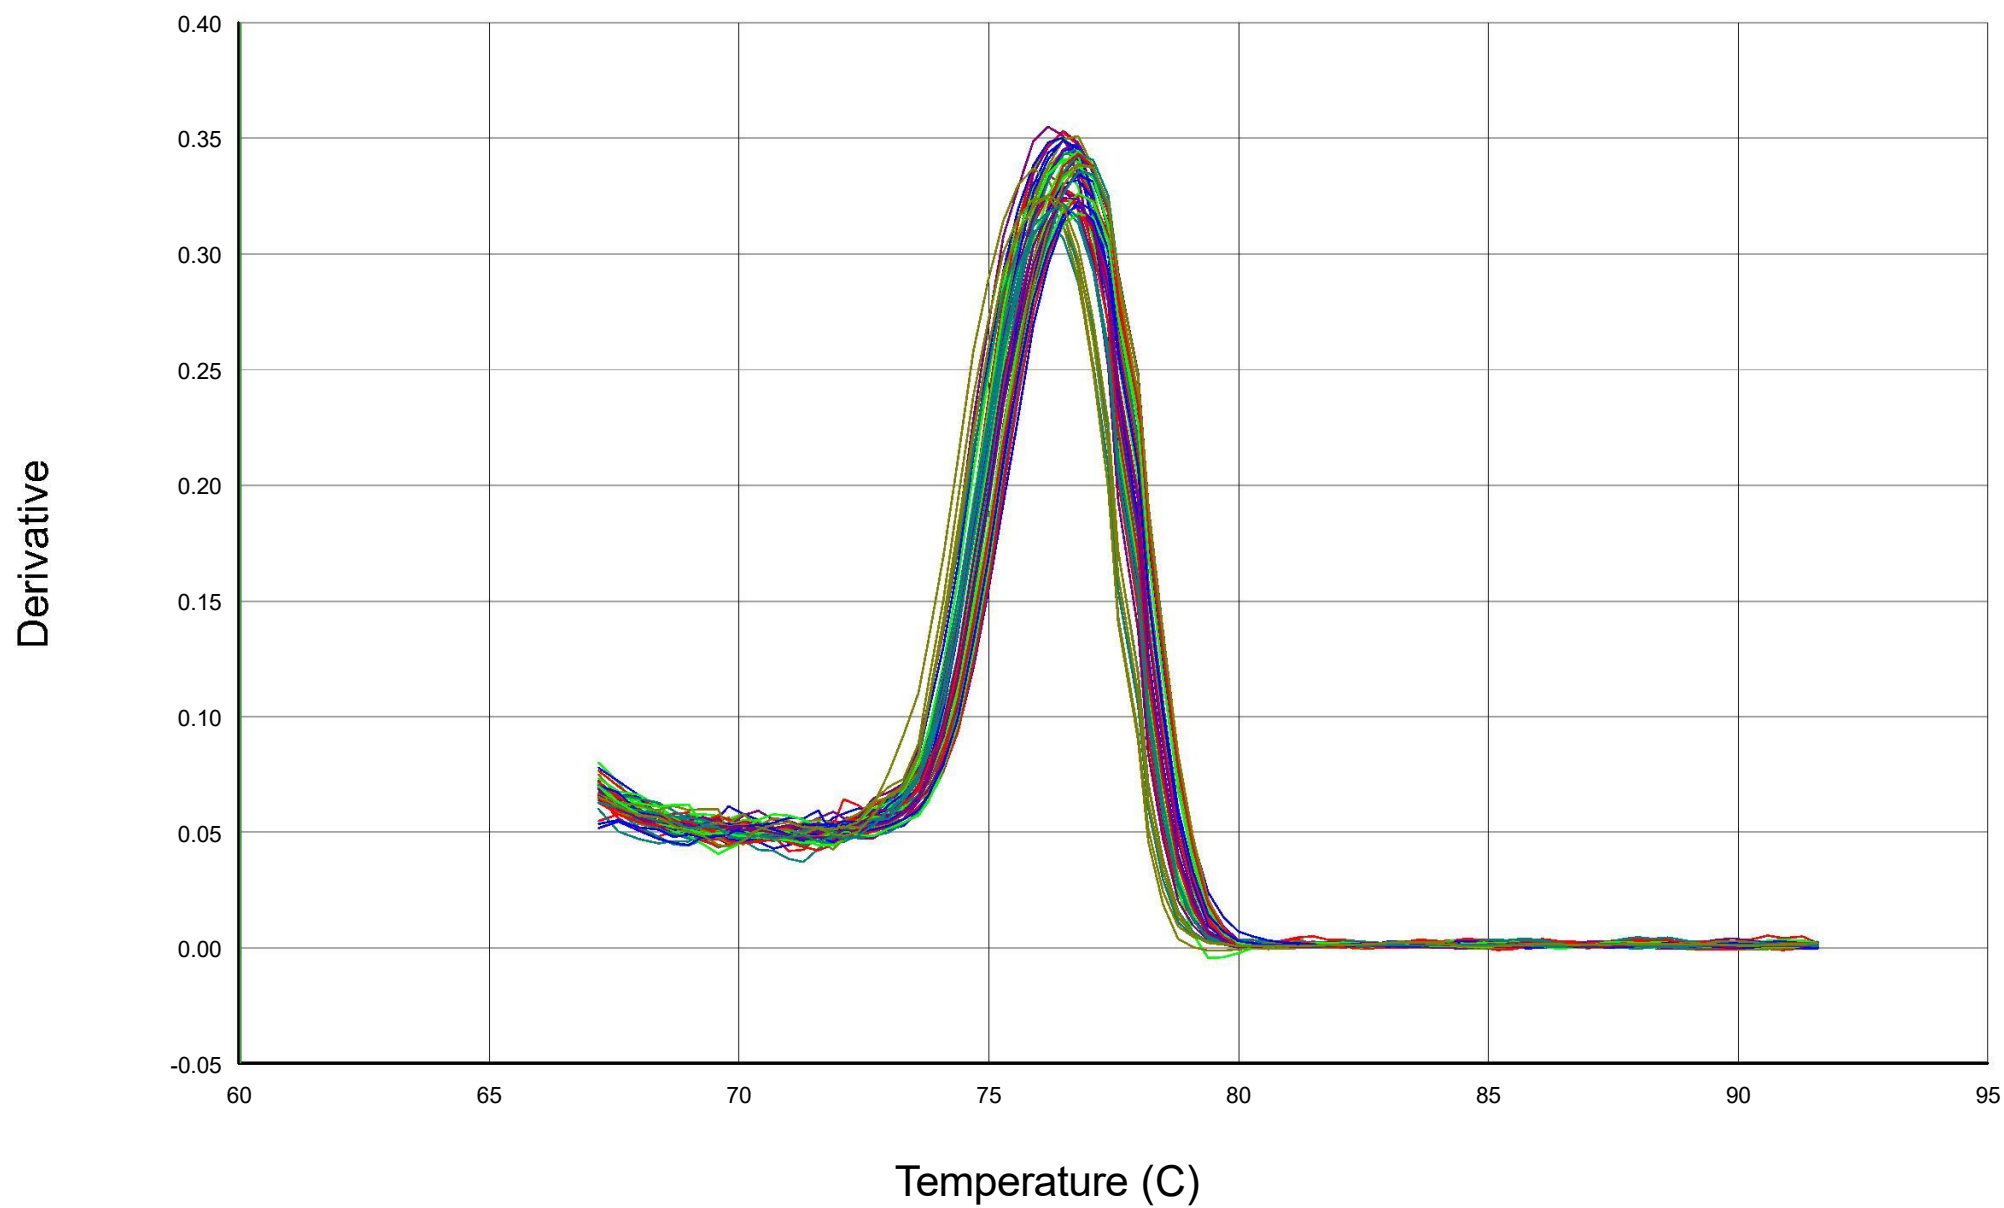

Detector = CAT\_Chicken, T<sub>m</sub> = 60.0 °C

Well(s): A1-D12

Document: L\_Broiler\_CAT\_plate 1 (Absolute Quantification)

## Dissociation Curve

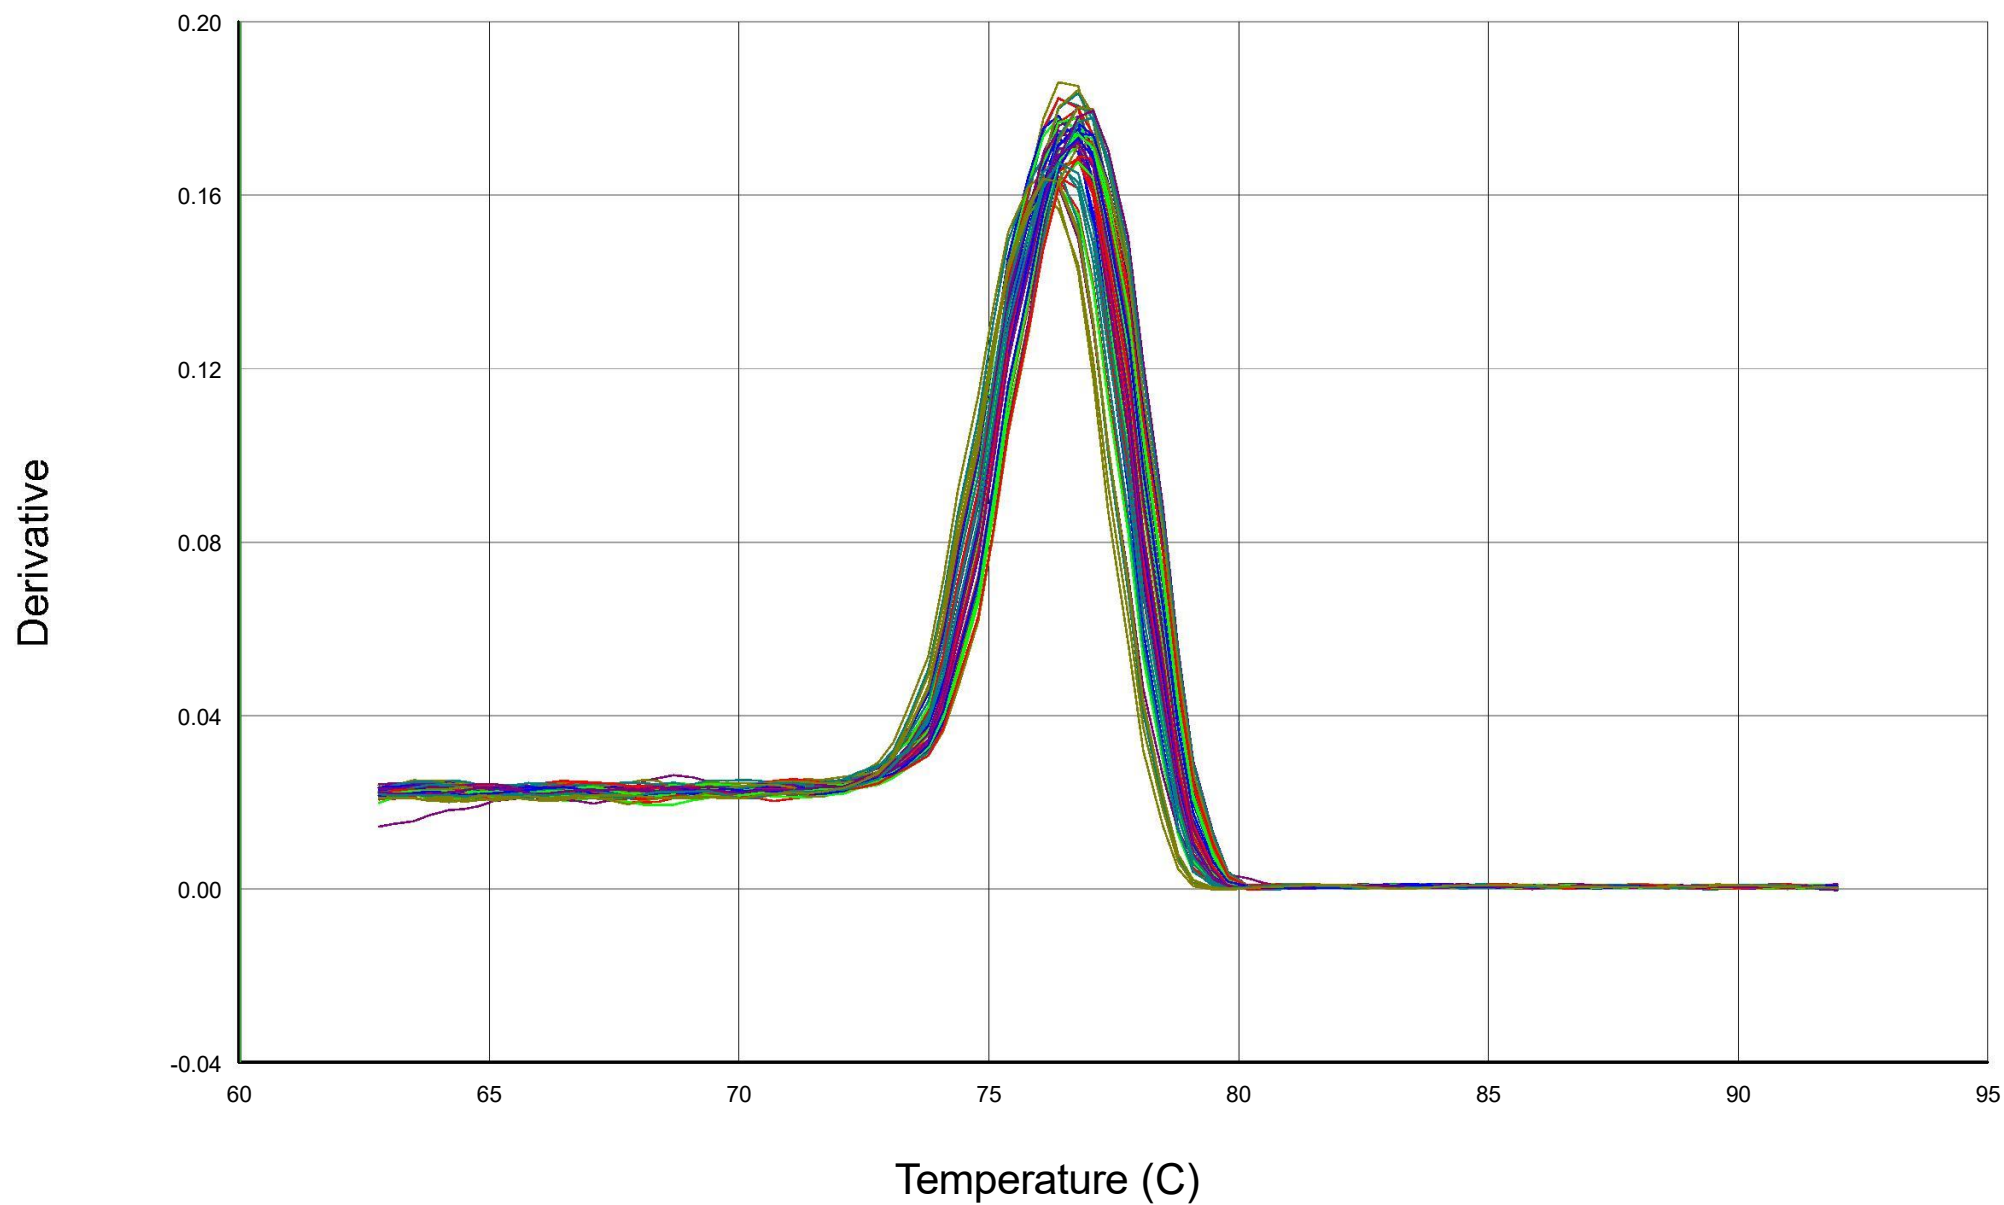

Detector = CAT\_Chicken, T<sub>m</sub> = 60.0 °C

Well(s): A1-D12

Document: L\_Broiler\_CAT\_plate 2 (Absolute Quantification)

## Dissociation Curve

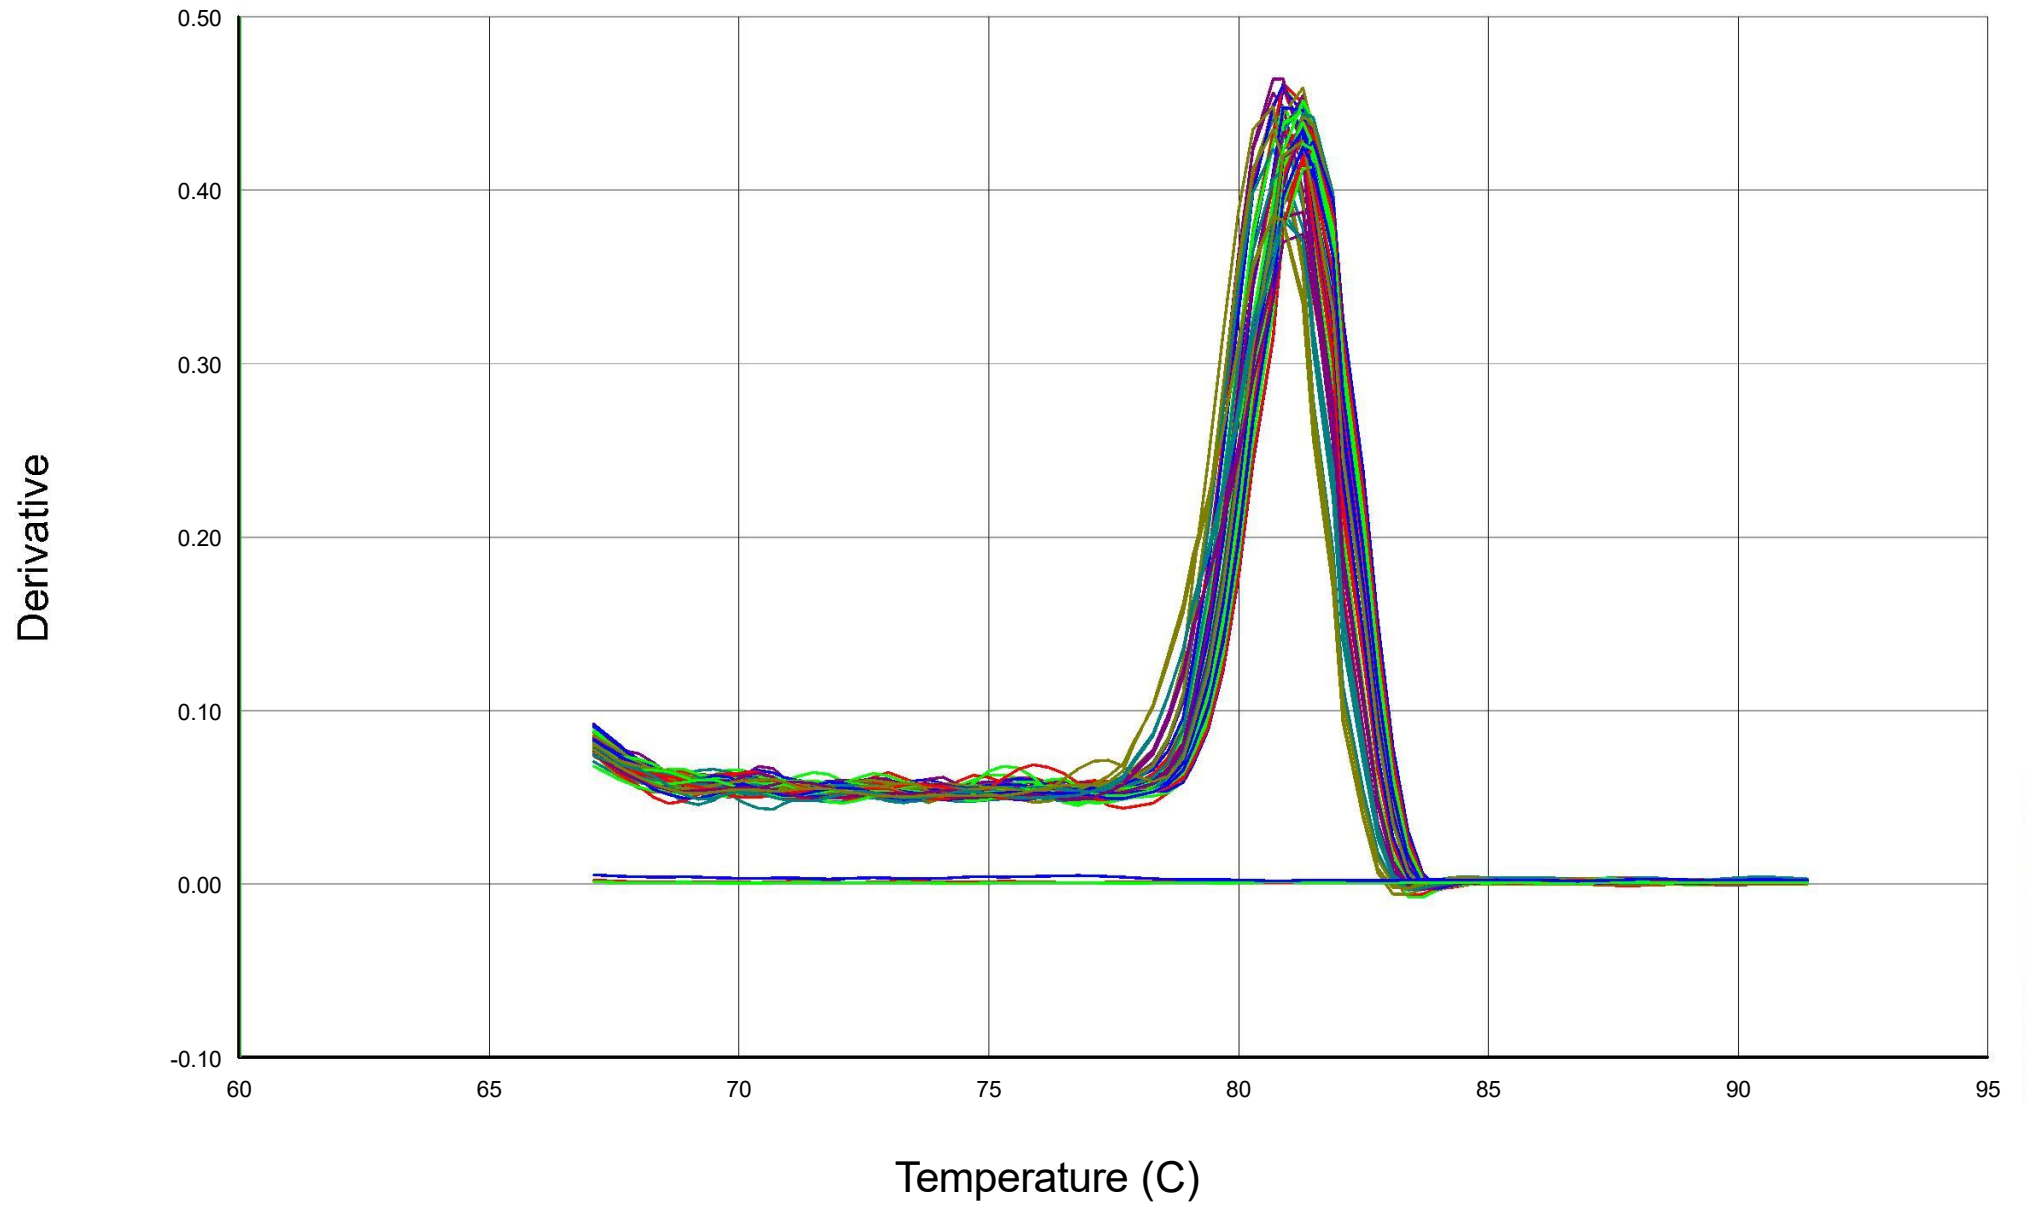

Detector = CYP2A6, T<sub>m</sub> = 60.0 °C

Well(s): A1-D12,H7-H9

Document: L\_Broiler\_CYP2A6\_plate 1.sds (Absolute Quantification)

## Dissociation Curve

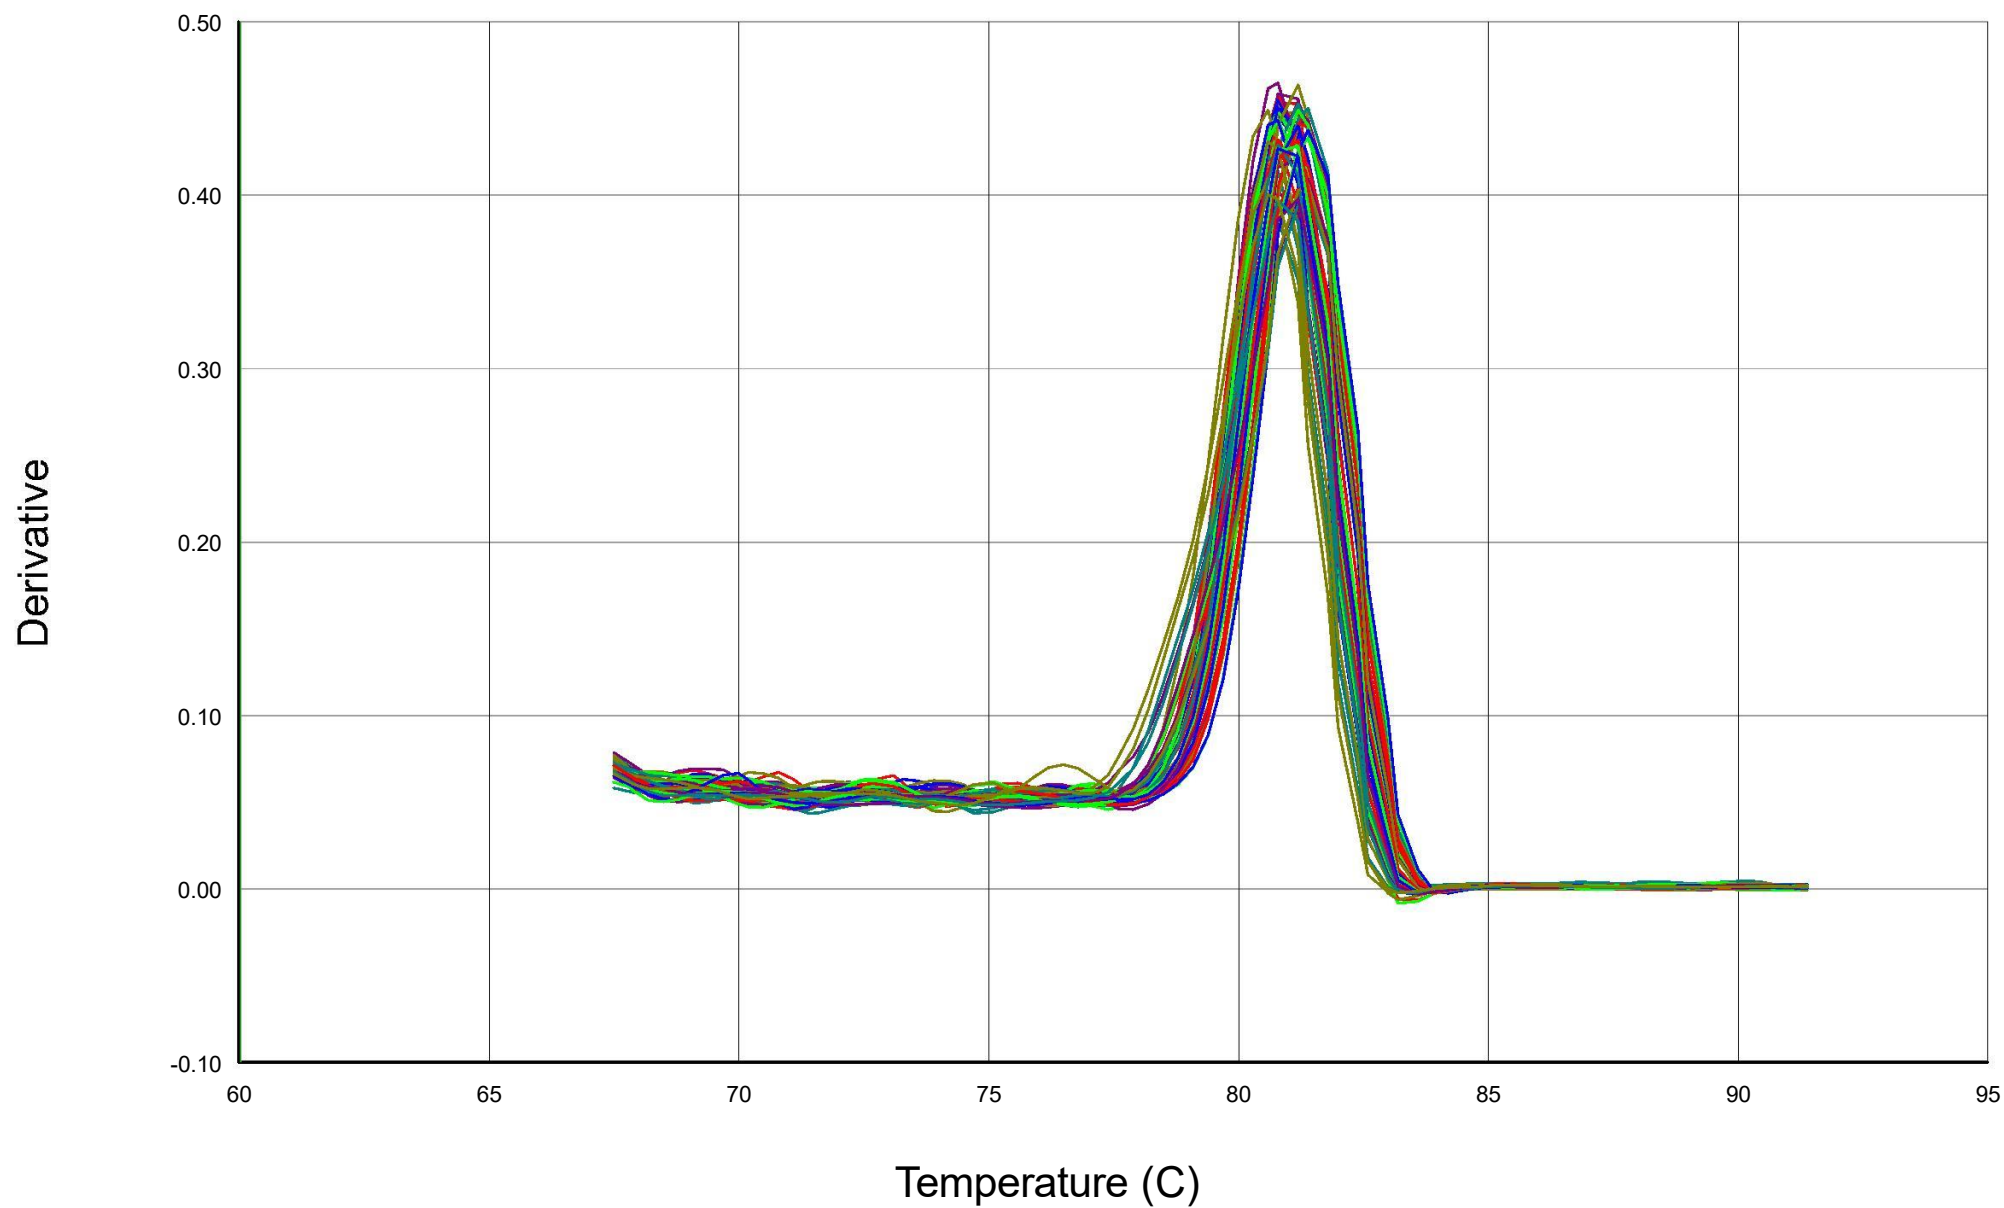

Detector = CYP2A6, Tm = 60.0 °C

Well(s): A1-D12

Document: L\_Broiler\_CYP2A6\_plate 2.sds (Absolute Quantification)

## Dissociation Curve

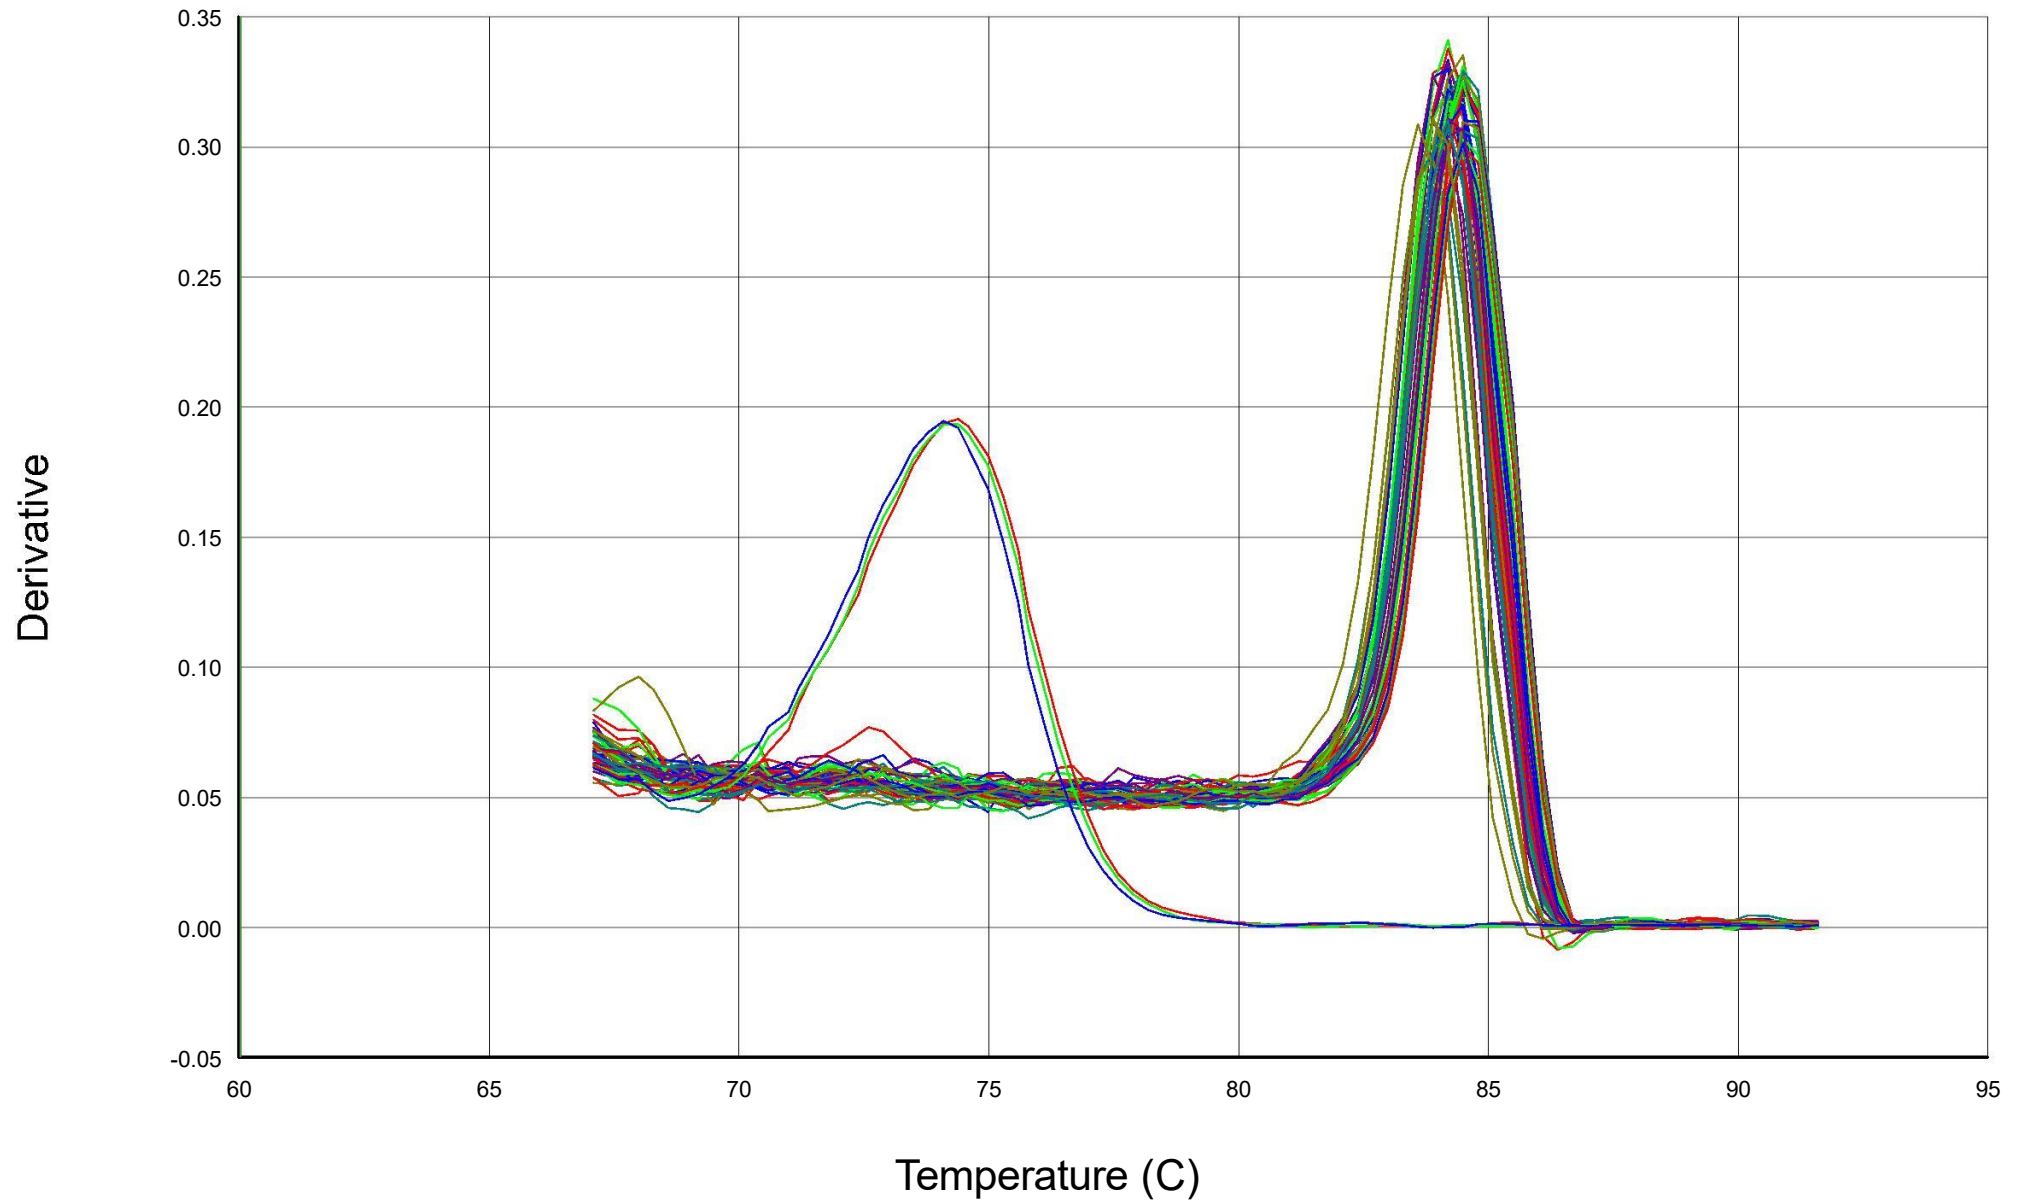

Detector = GPX1\_Chicken, Tm = 60.0 °C

Well(s): A1-D12,H7-H9

Document: L\_Broiler\_GPX1\_plate 1 (Absolute Quantification)



## Dissociation Curve

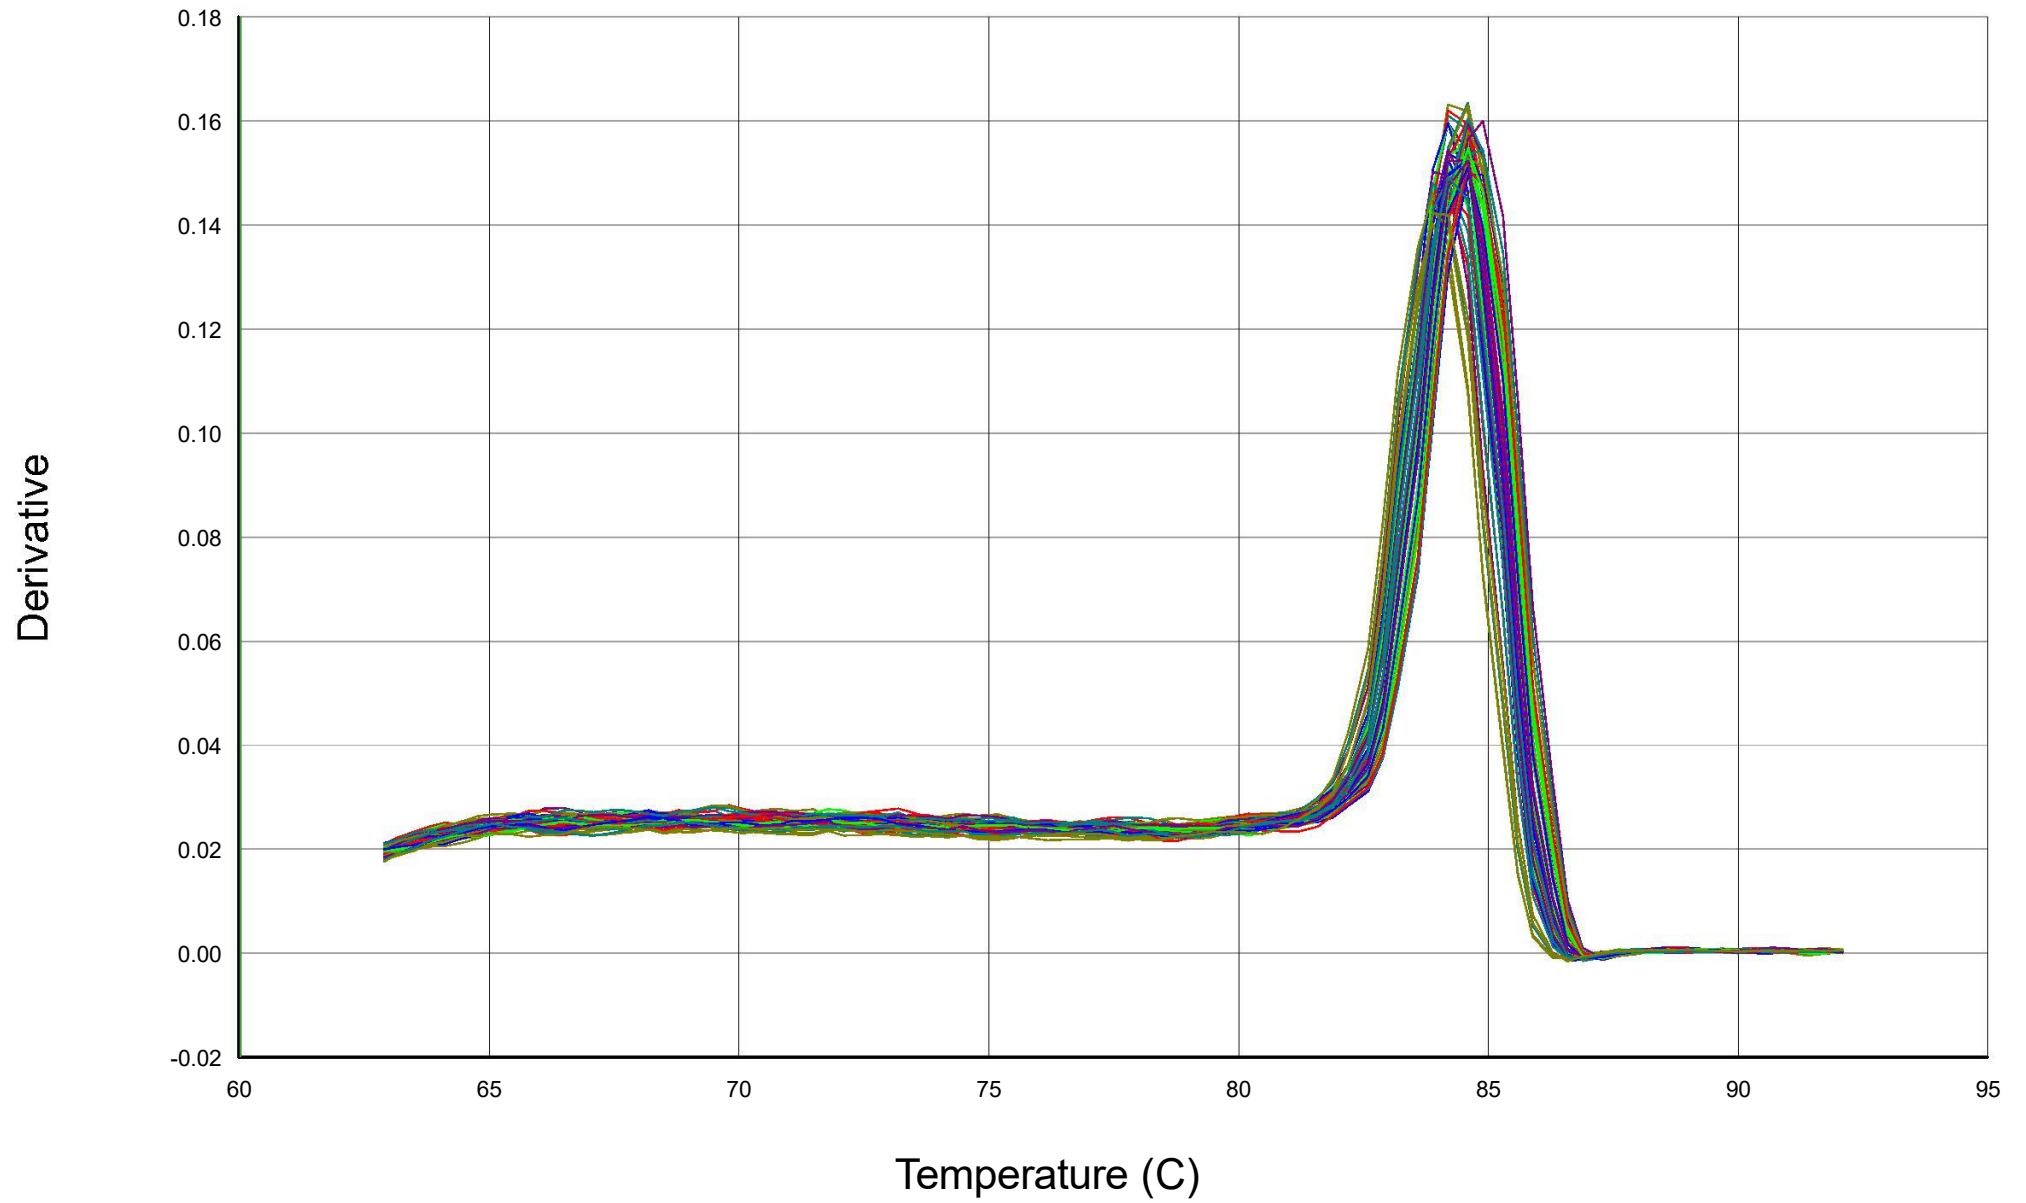

Detector = GPX1\_Chicken, T<sub>m</sub> = 60.0 °C

Well(s): A1-D12

Document: L\_Broiler\_GPX1\_plate 2 (Absolute Quantification)

## Dissociation Curve

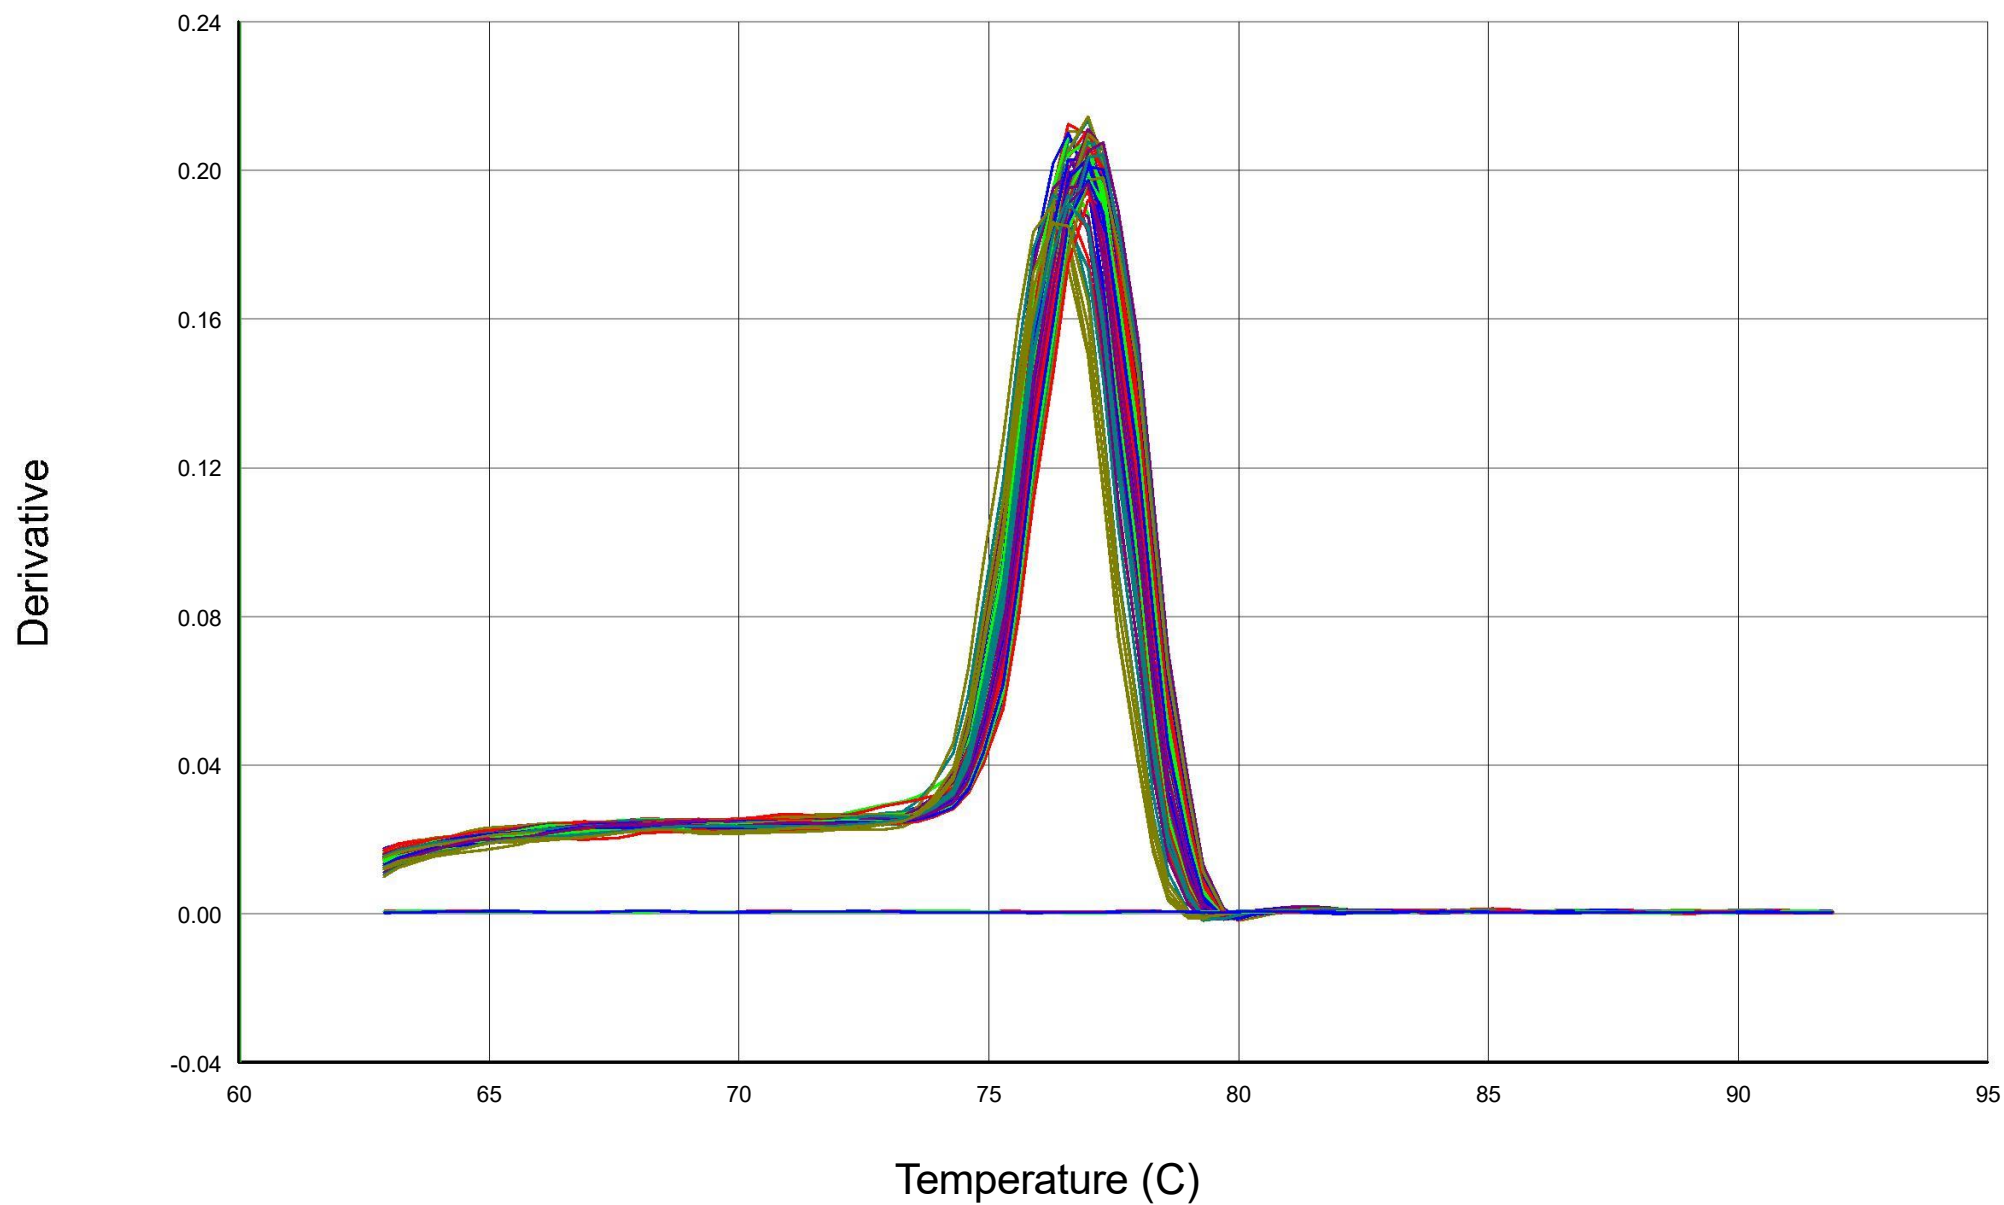

Detector = Nrf2\_Chicken, T<sub>m</sub> = 60.0 °C

Well(s): A1-D12,H7-H9

Document: L\_Broiler\_Nrf2\_plate1.sds (Absolute Quantification)

## Dissociation Curve

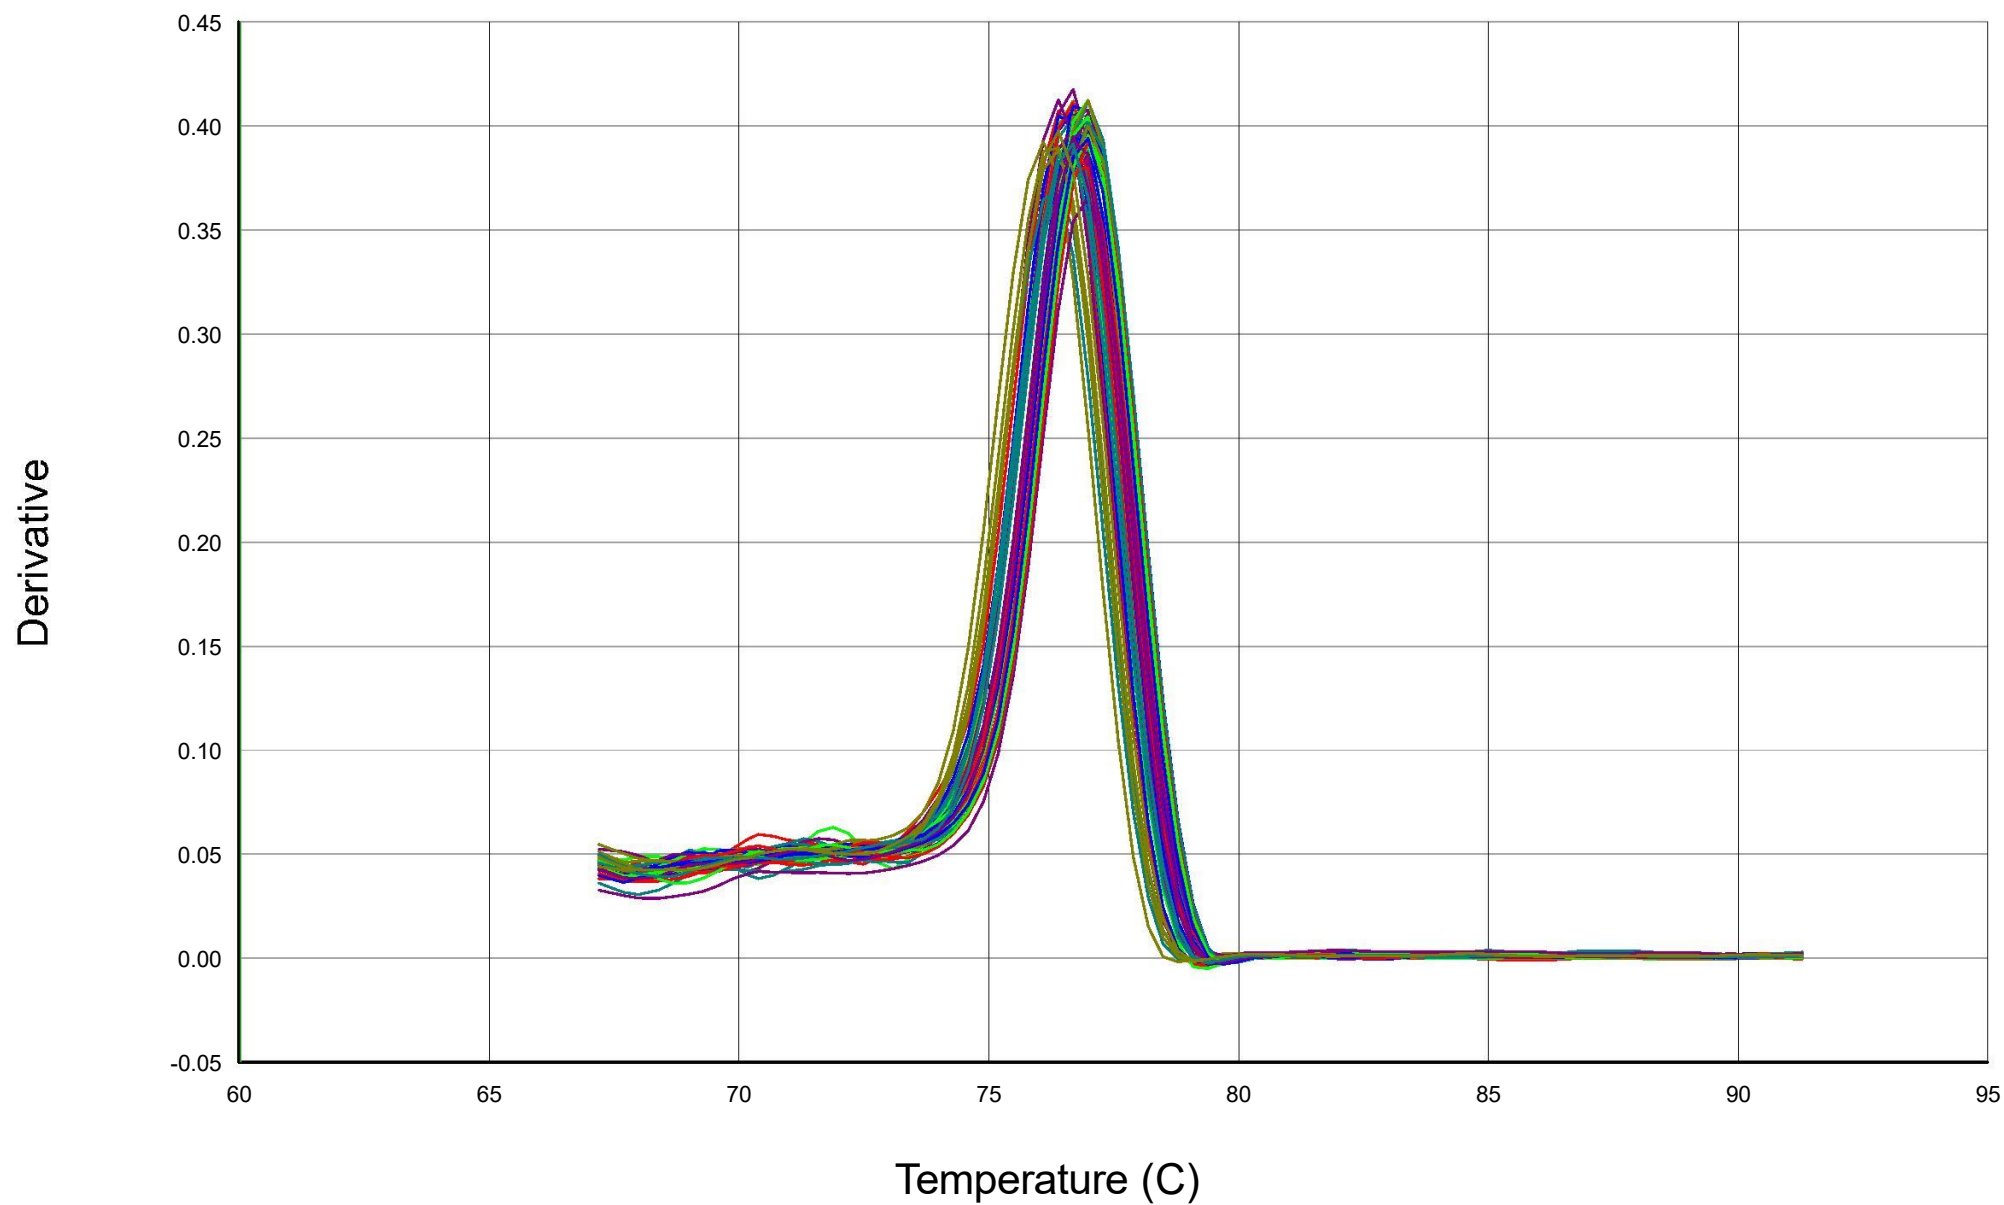

Detector = Nrf2\_Chicken, T<sub>m</sub> = 60.0 °C

Well(s): A1-D12

Document: L\_Broiler\_Nrf2\_plate2.sds (Absolute Quantification)

## Dissociation Curve

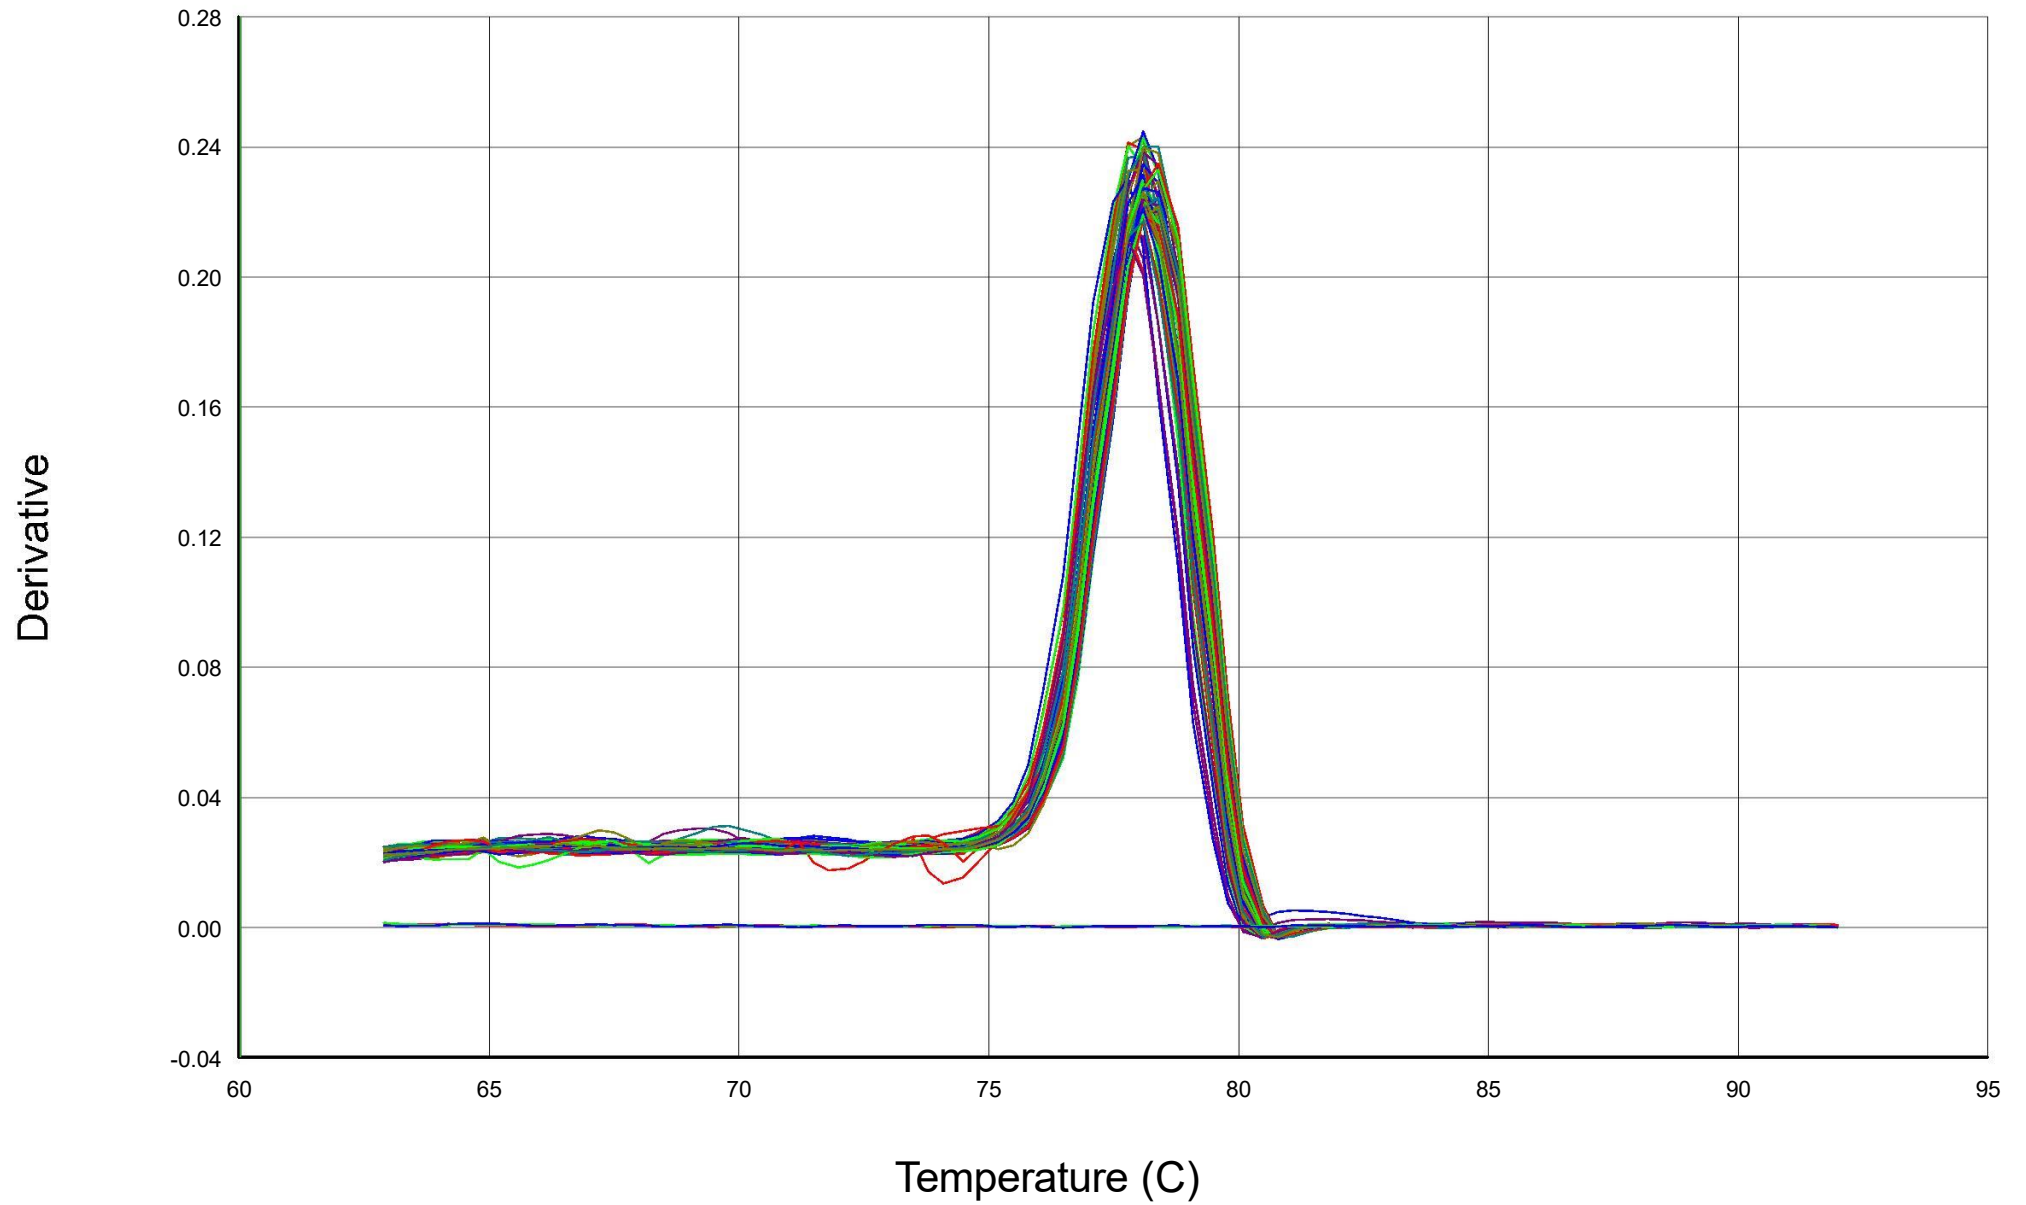

Detector = PGK2\_chicken, T<sub>m</sub> = 60.0 °C

Well(s): A1-D12,H10-H12

Document: L\_Broiler\_PGK2\_plate 1 (Absolute Quantification)

## Dissociation Curve

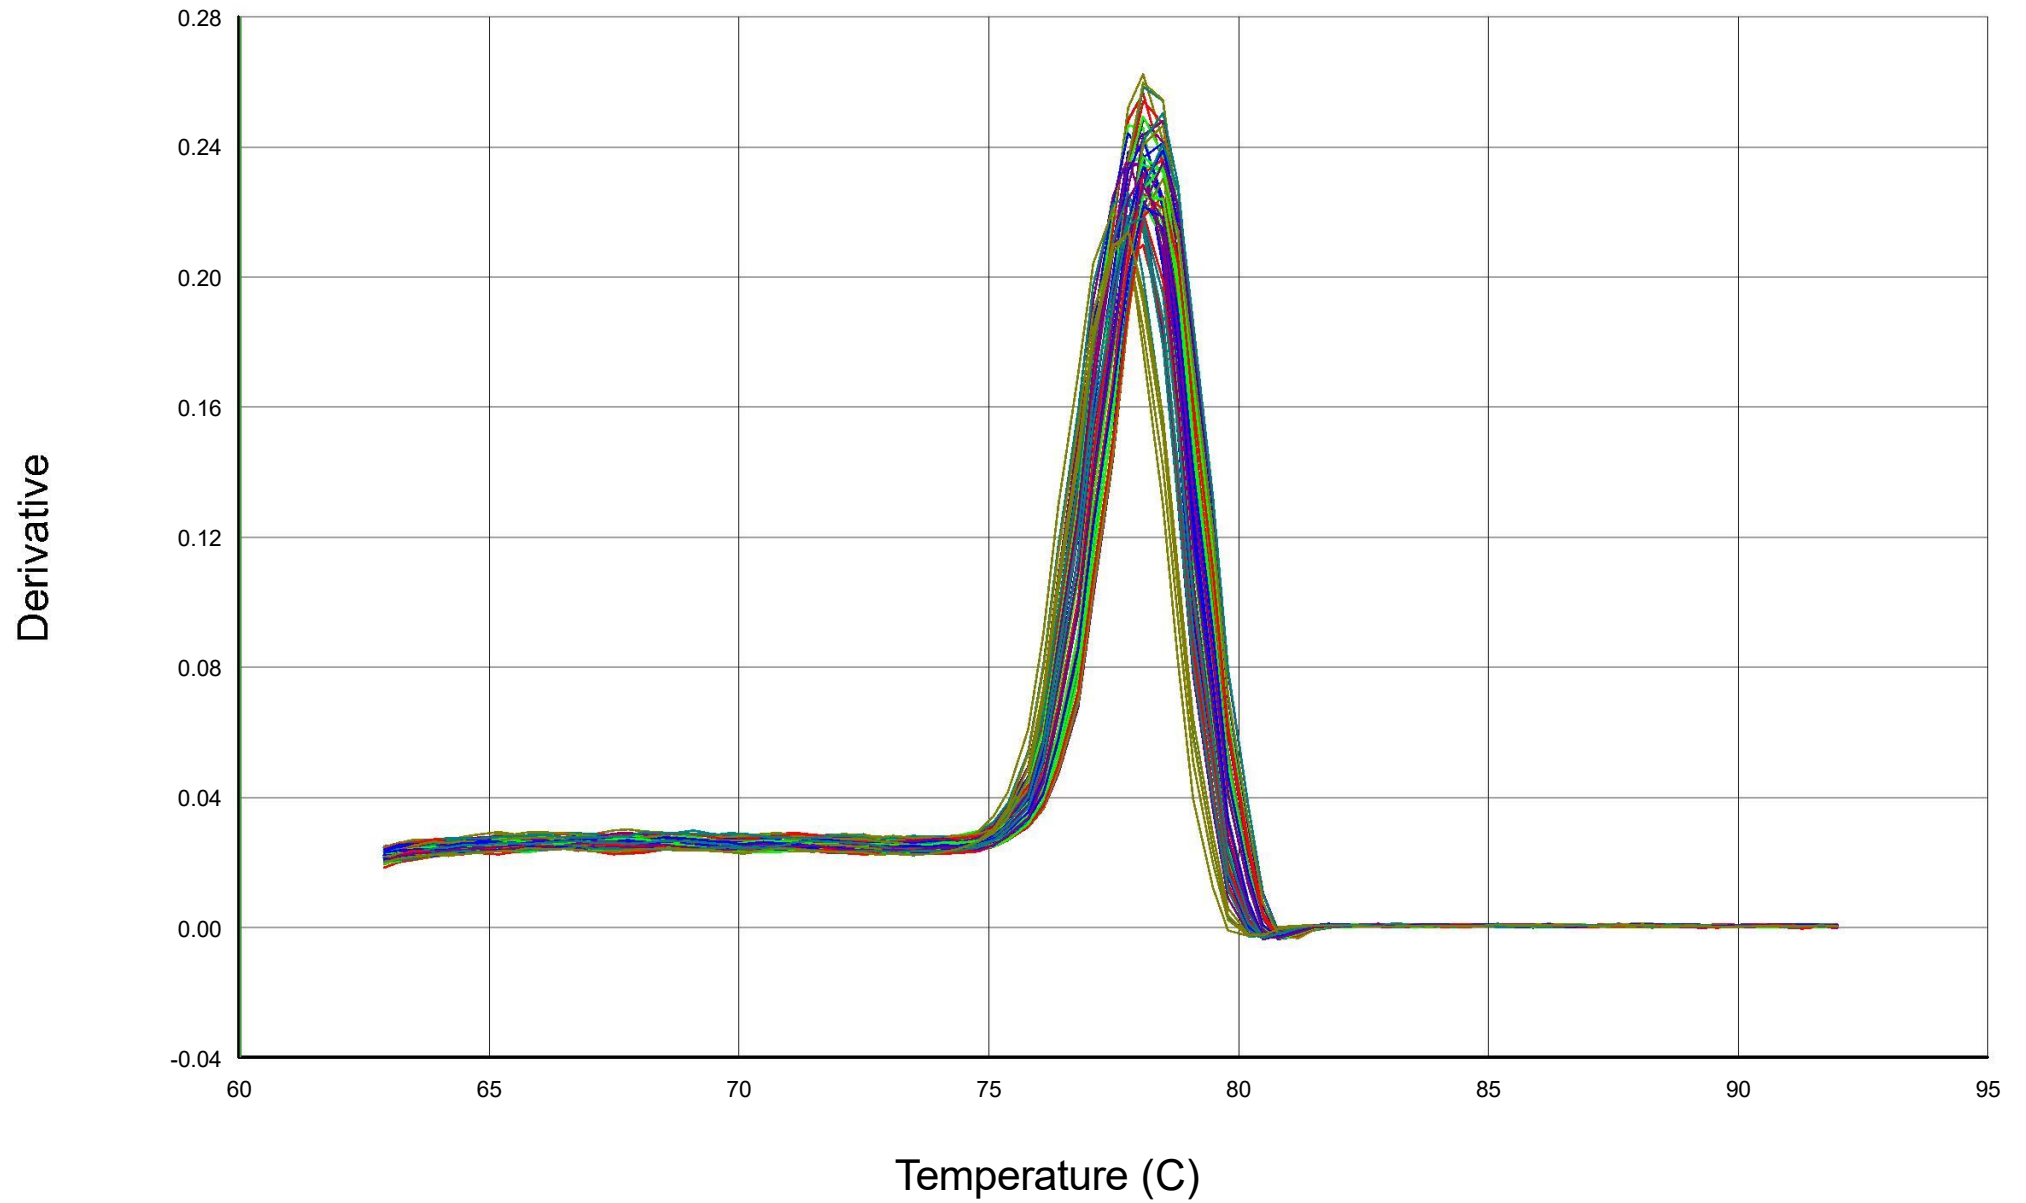

Detector = PGK2\_chicken, T<sub>m</sub> = 60.0 °C

Well(s): A1-D12

Document: L\_Broiler\_PGK2\_plate 2 (Absolute Quantification)

## Dissociation Curve

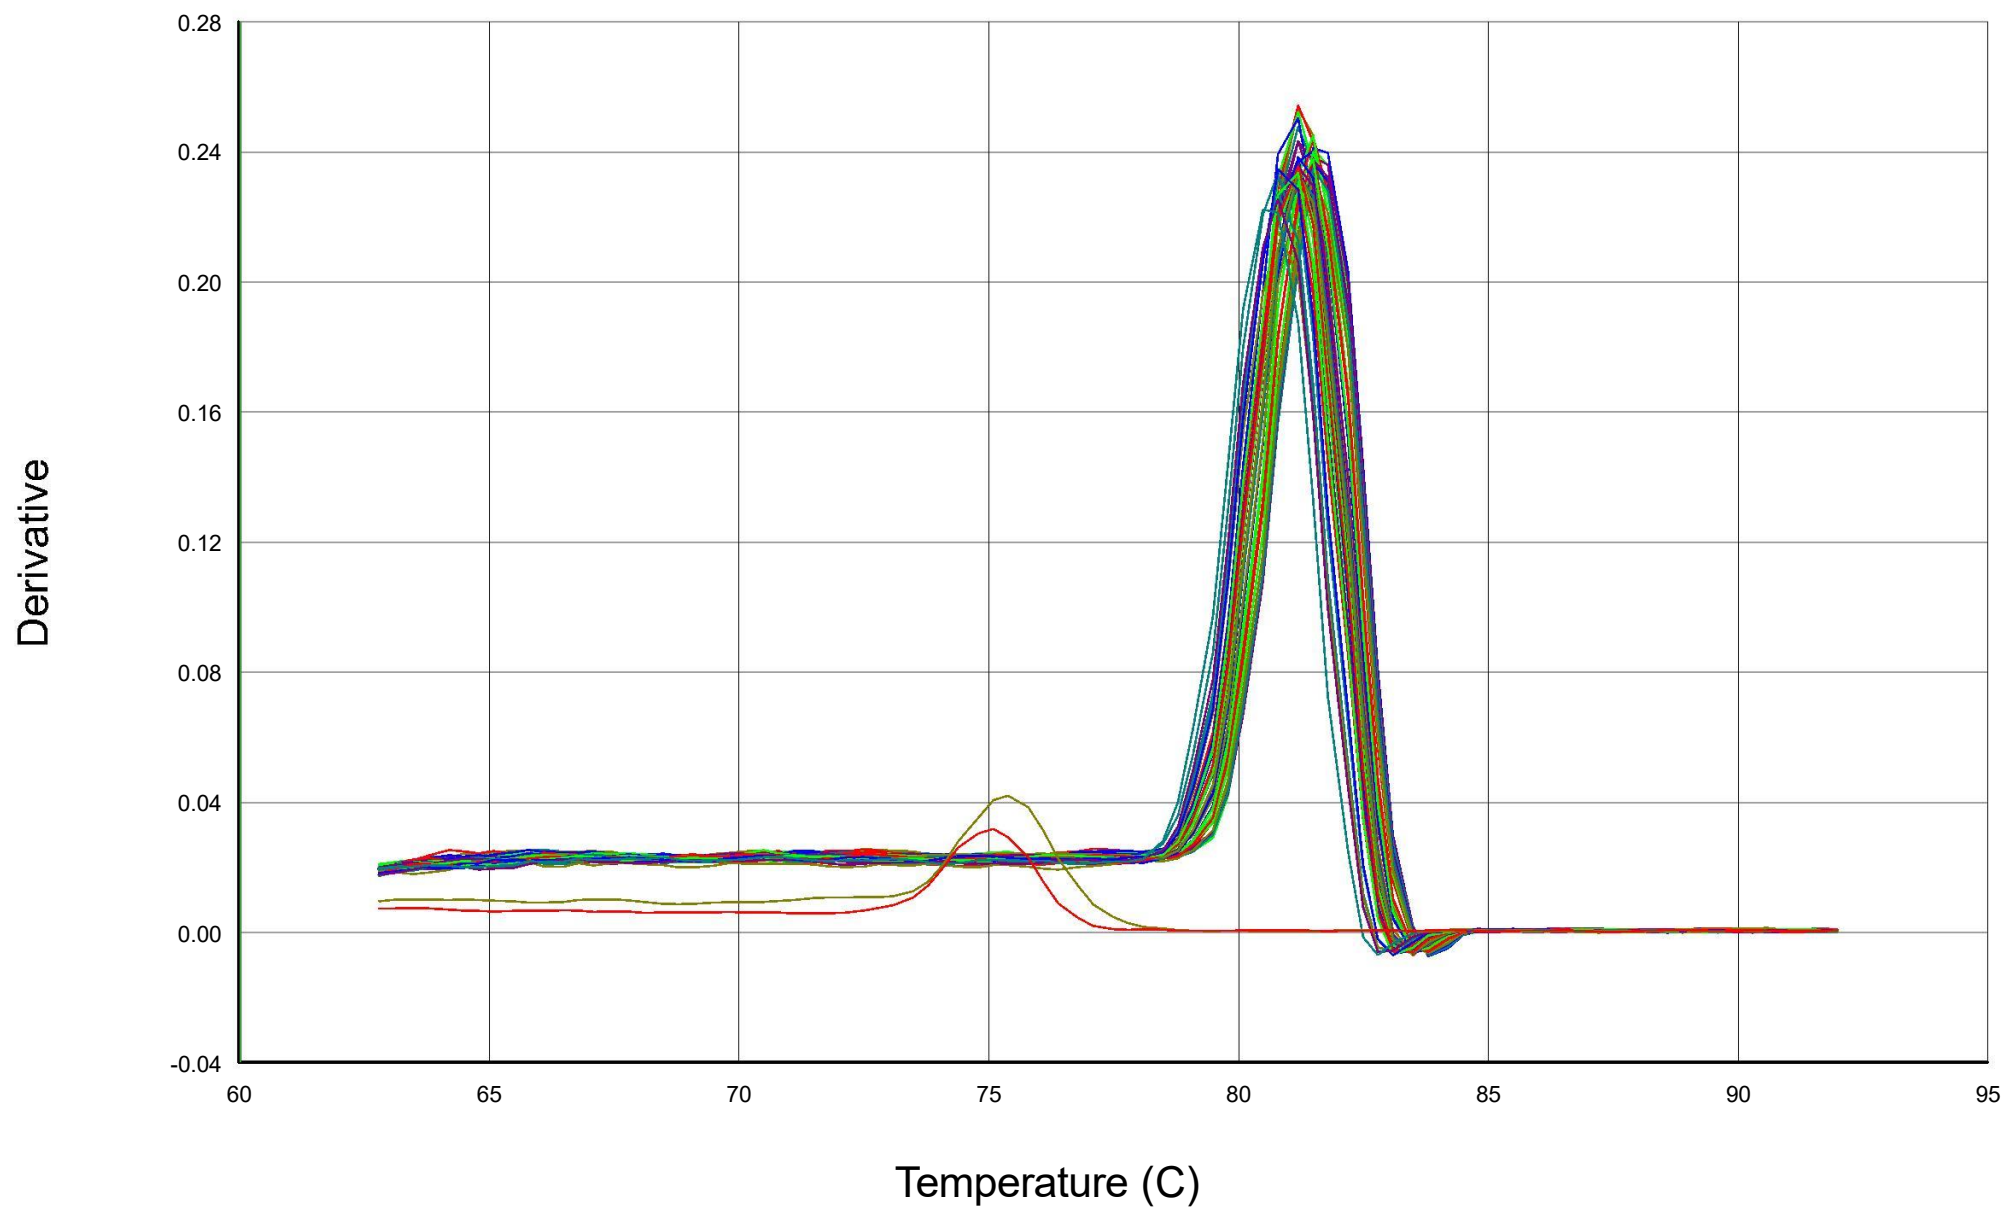

Detector = RPS7\_Chicken, T<sub>m</sub> = 60.0 °C

Well(s): A1-D12,H8-H9

Document: L\_Broiler\_RPS7\_plate 1 (Absolute Quantification)

## Dissociation Curve

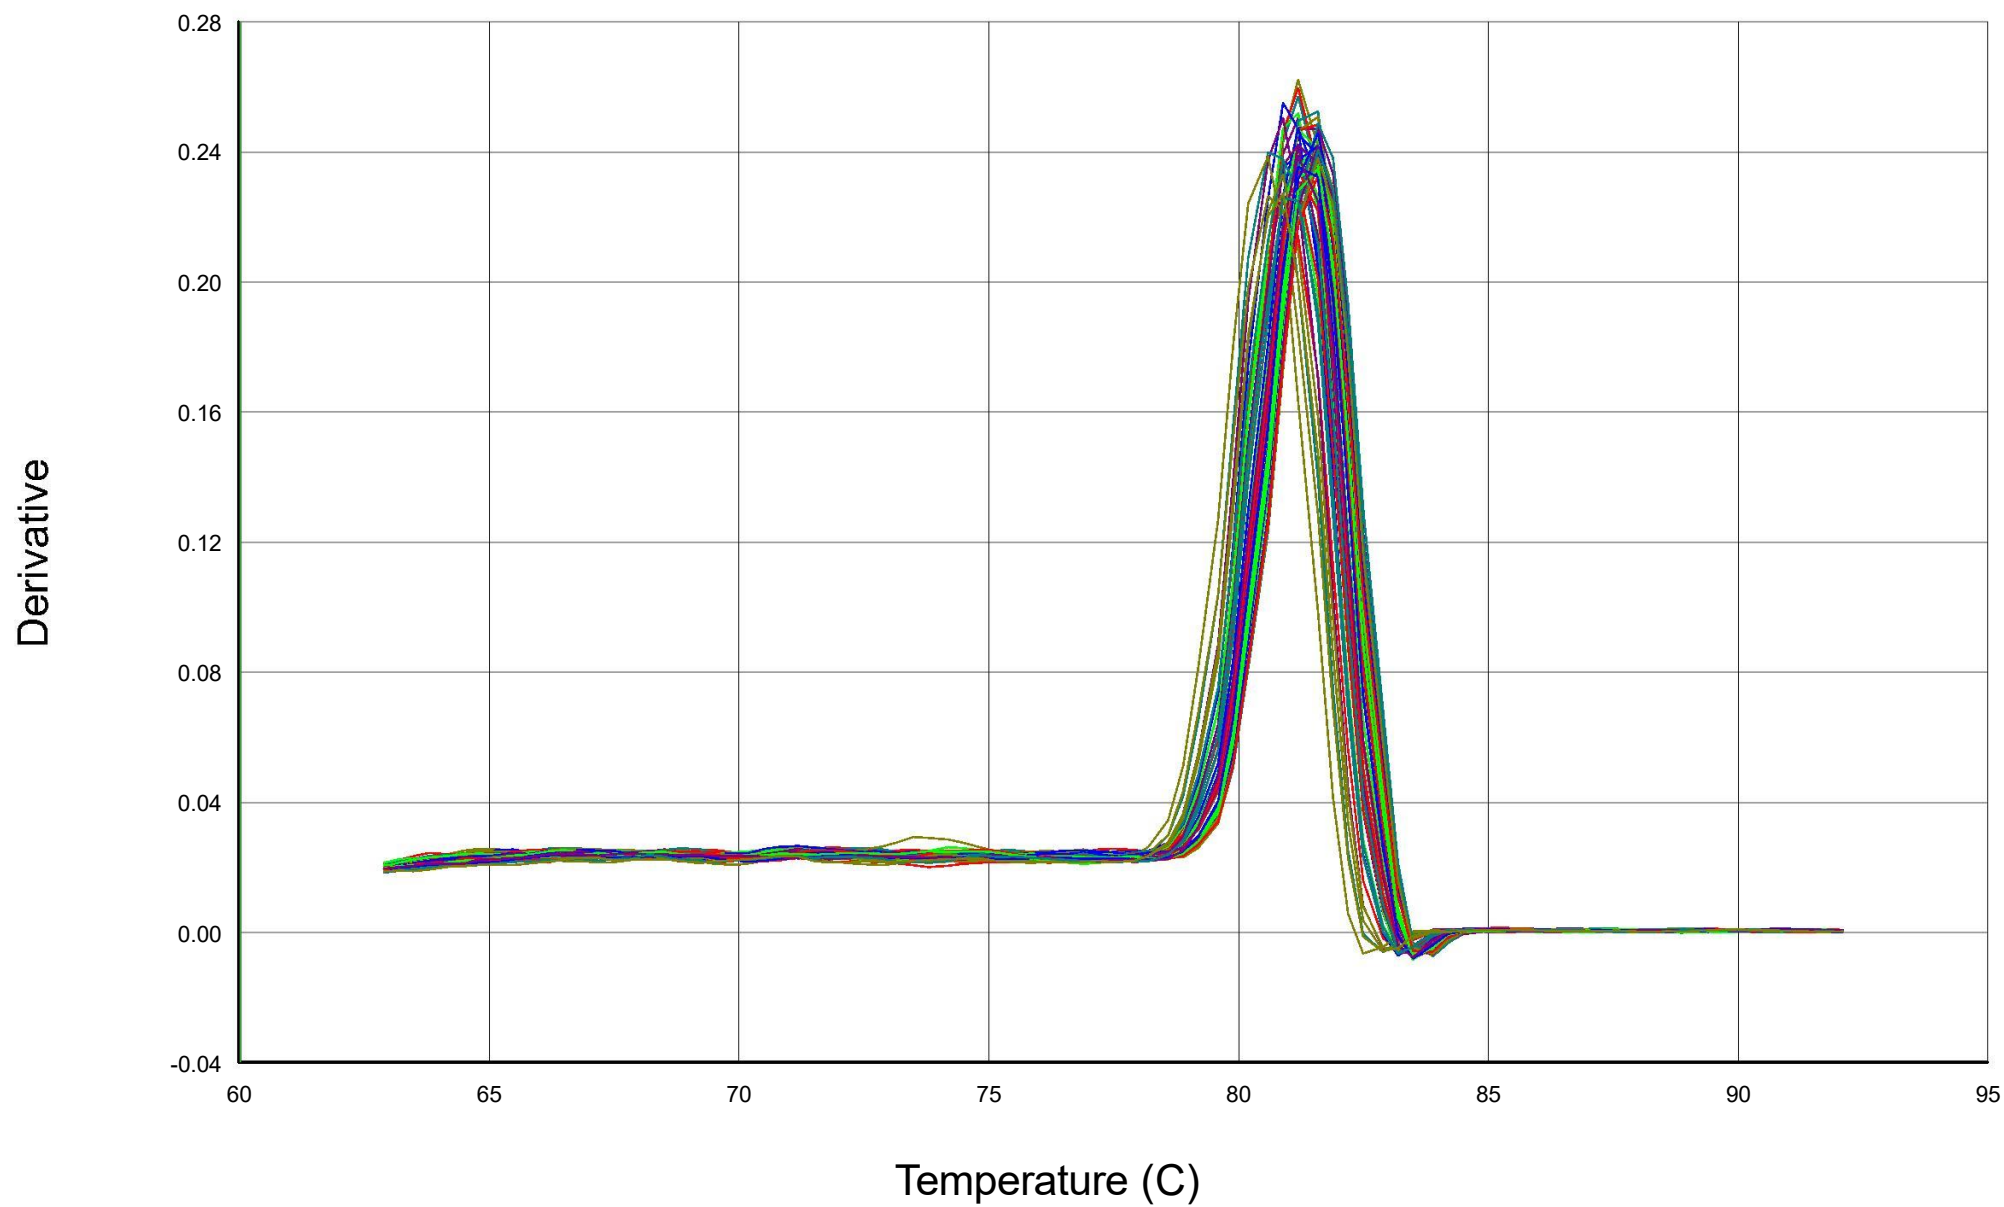

Detector = RPS7\_Chicken, T<sub>m</sub> = 60.0 °C

Well(s): A1-D12

Document: L\_Broiler\_RPS7\_plate 2 (Absolute Quantification)

## Dissociation Curve

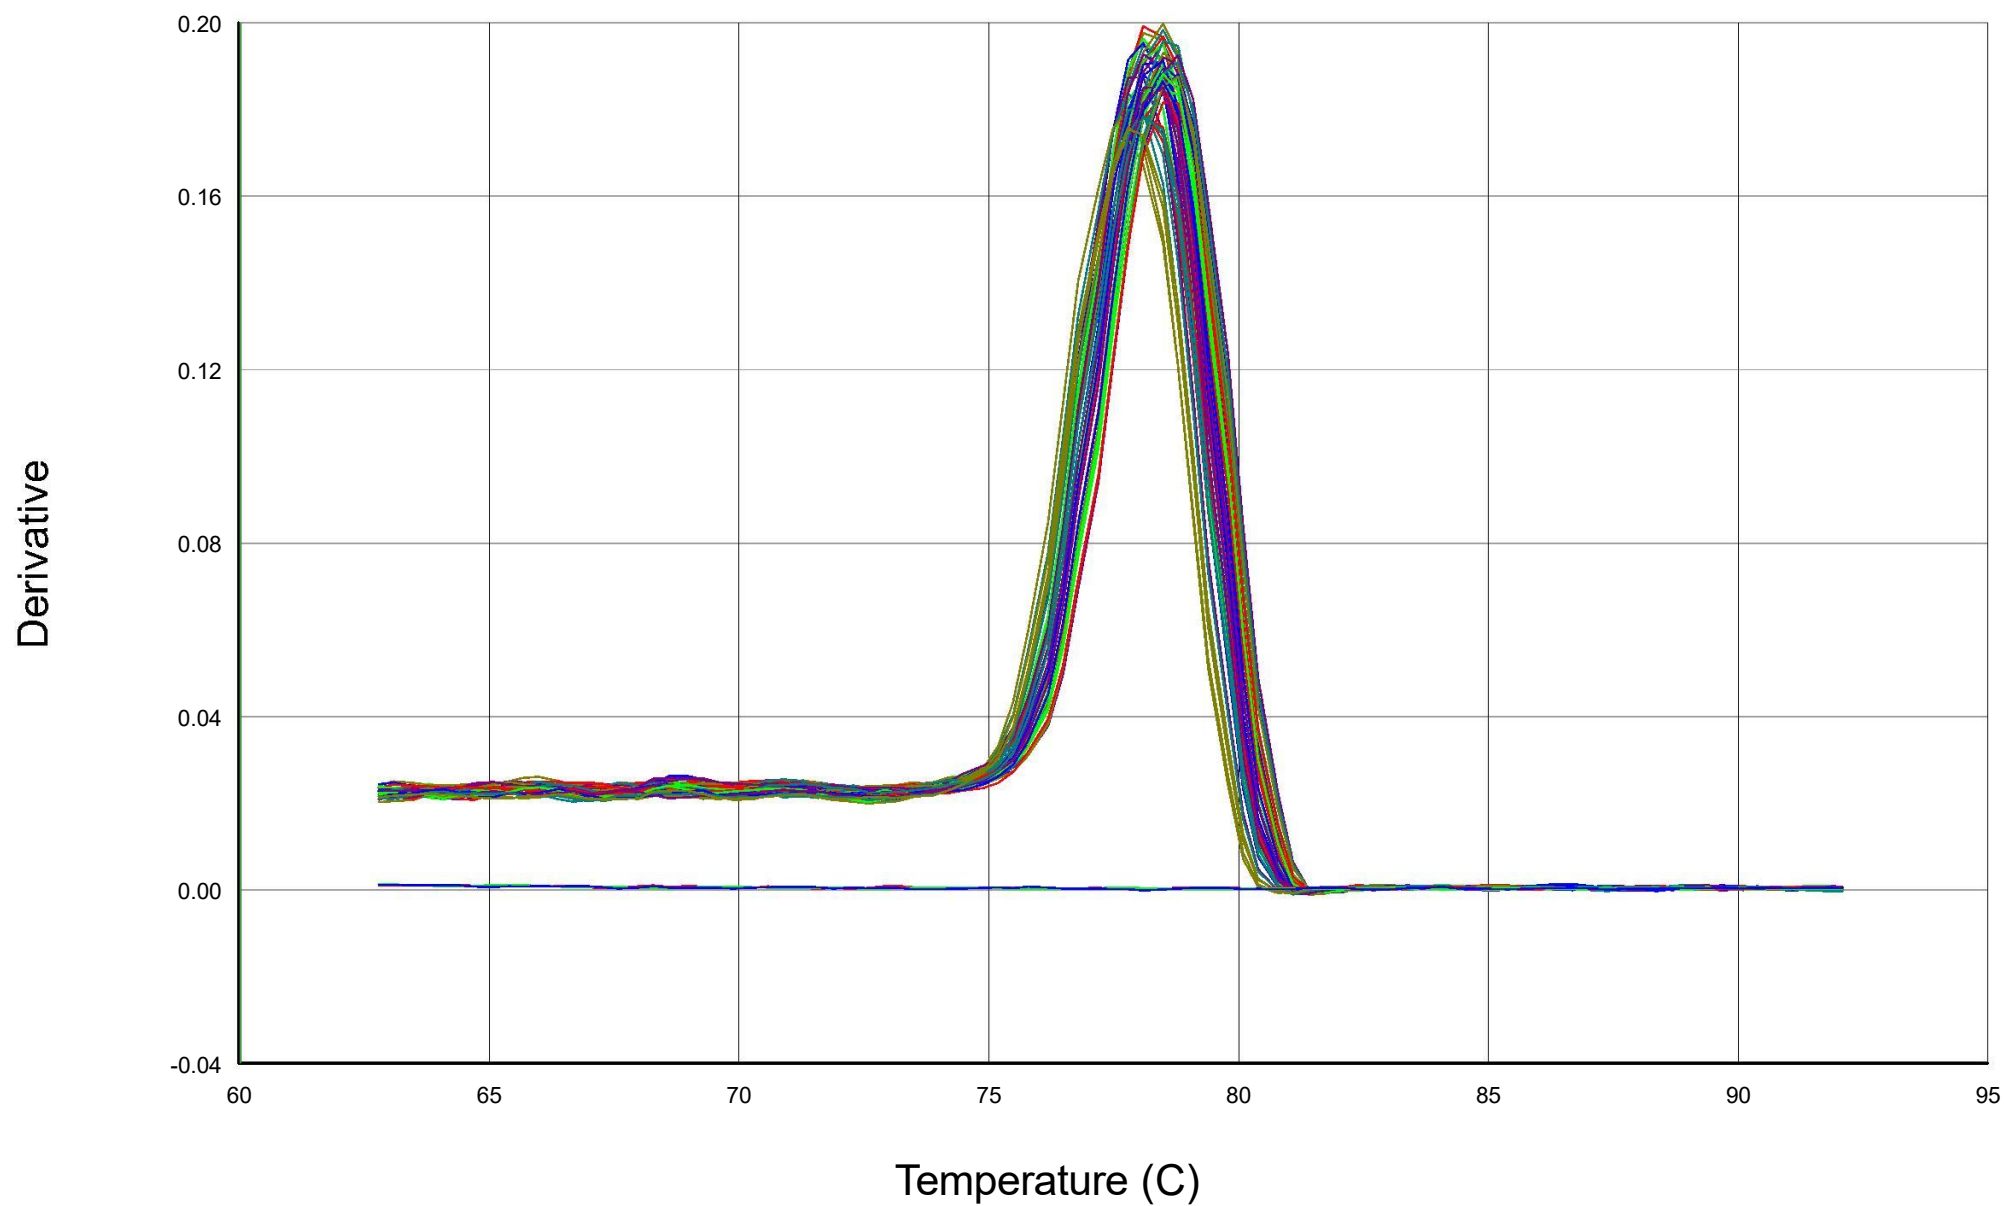

Detector = SOD2\_Chicken, T<sub>m</sub> = 60.0 °C

Well(s): A1-D12,H7-H9

Document: L\_Broiler\_SOD2\_plate 1 (Absolute Quantification)



## Dissociation Curve

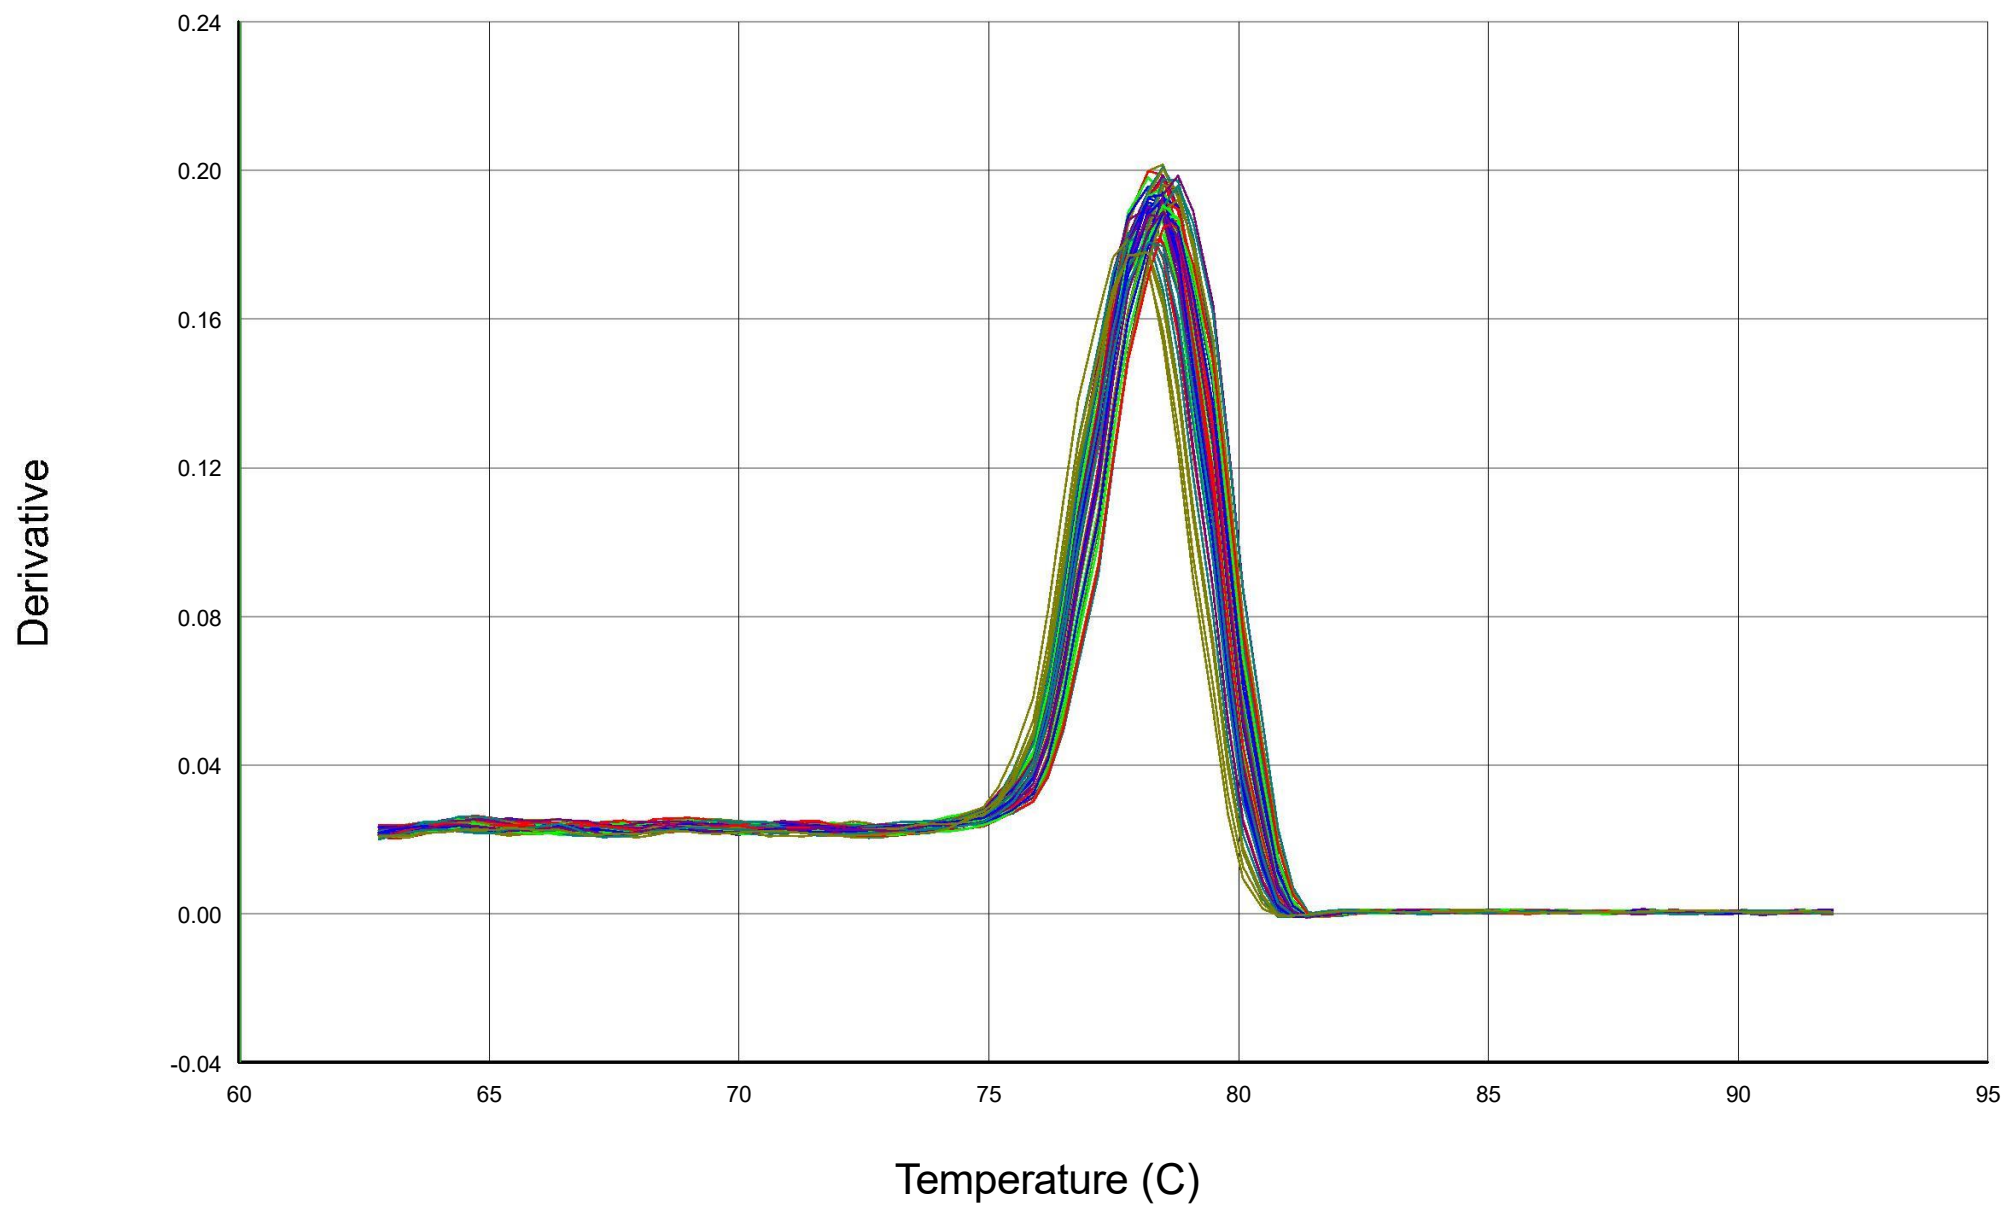

Detector = SOD2\_Chicken, T<sub>m</sub> = 60.0 °C

Well(s): A1-D12

Document: L\_Broiler\_SOD2\_plate 2 (Absolute Quantification)

## Dissociation Curve

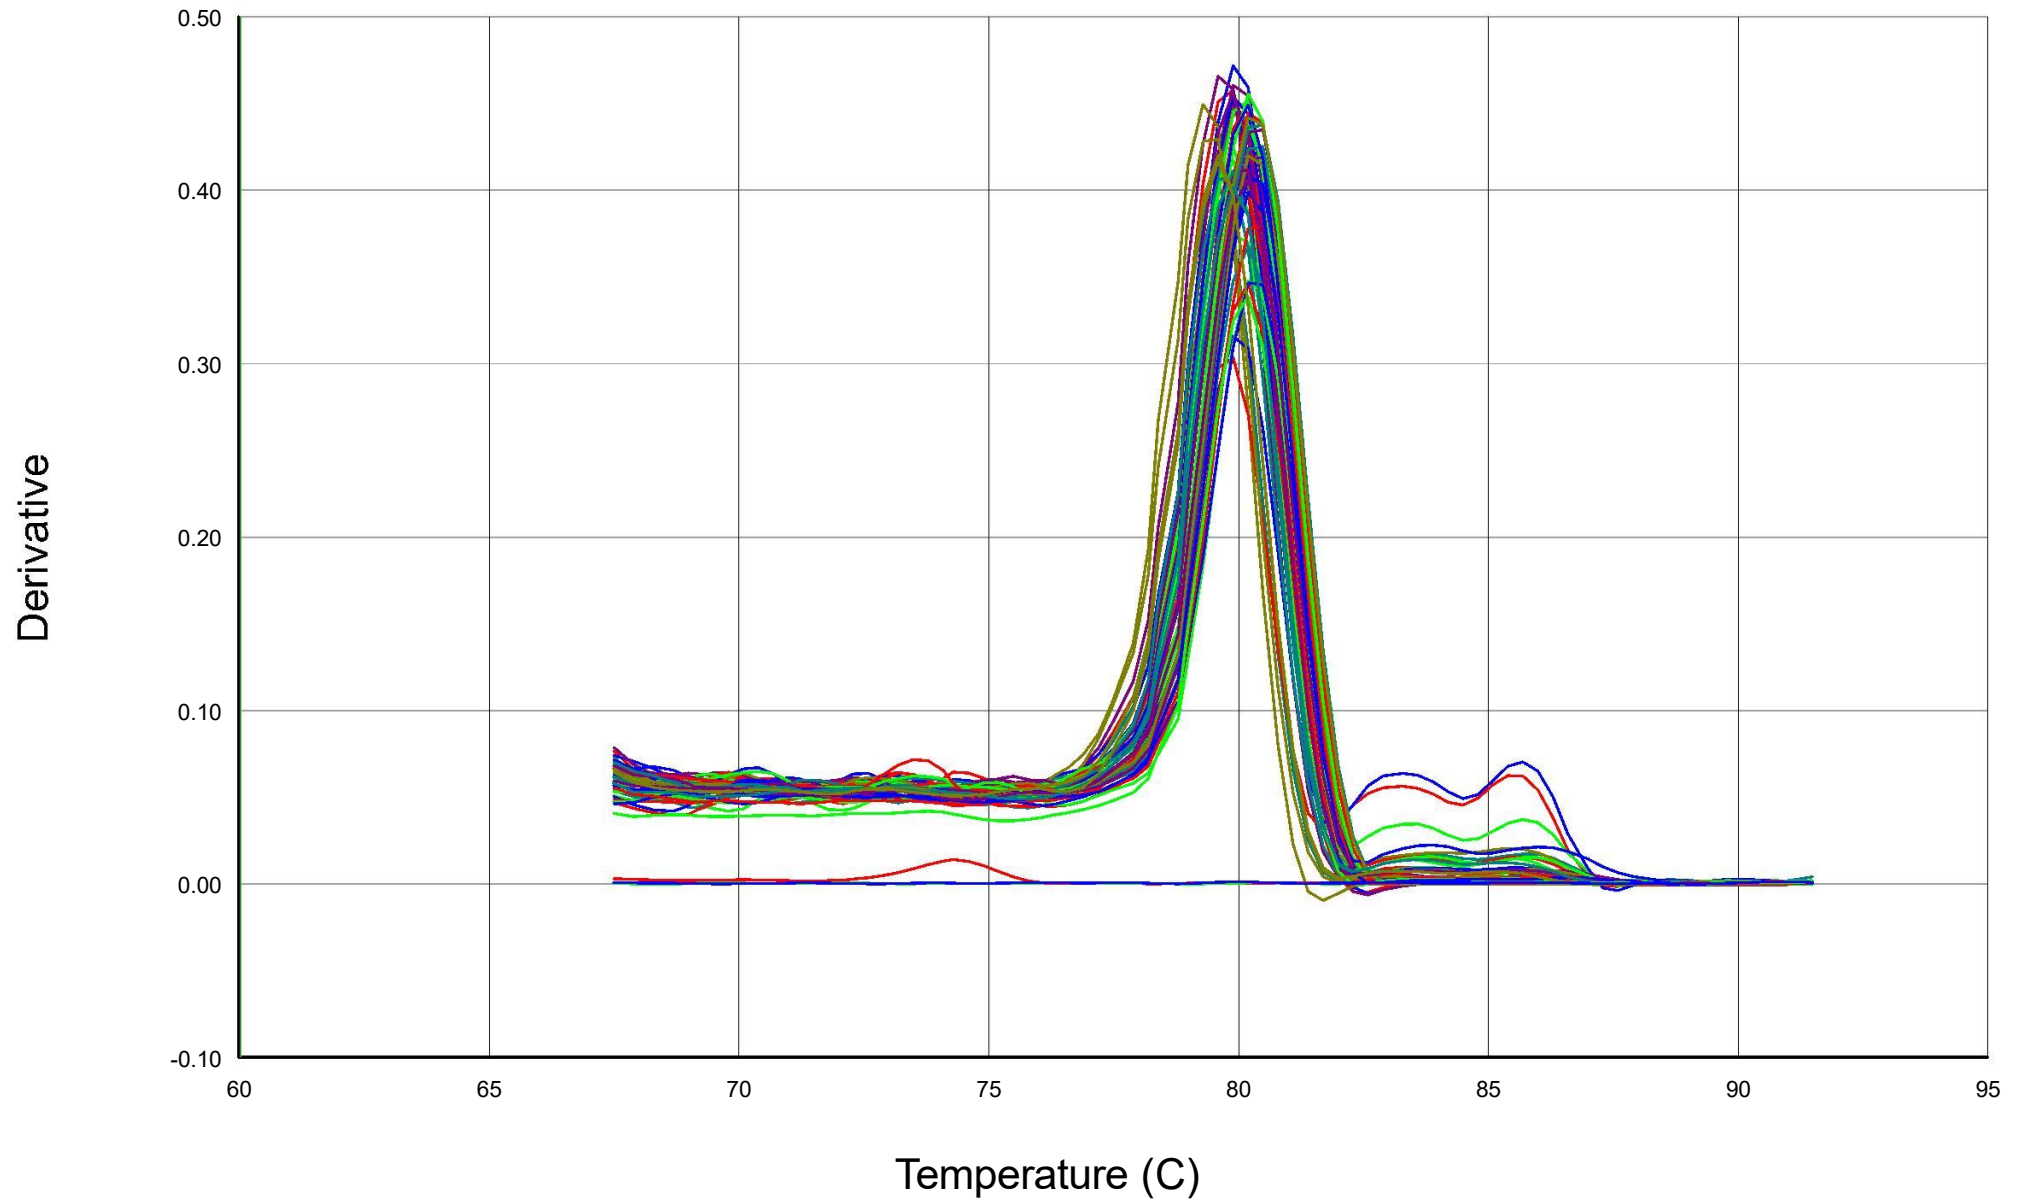

Detector = ABCC2\_Chicken, Tm = 60.0 °C

Well(s): A1-D12,H7-H9

Document: I\_Broiler\_ABCC2\_plate 1.sds (Absolute Quantification)

## Dissociation Curve

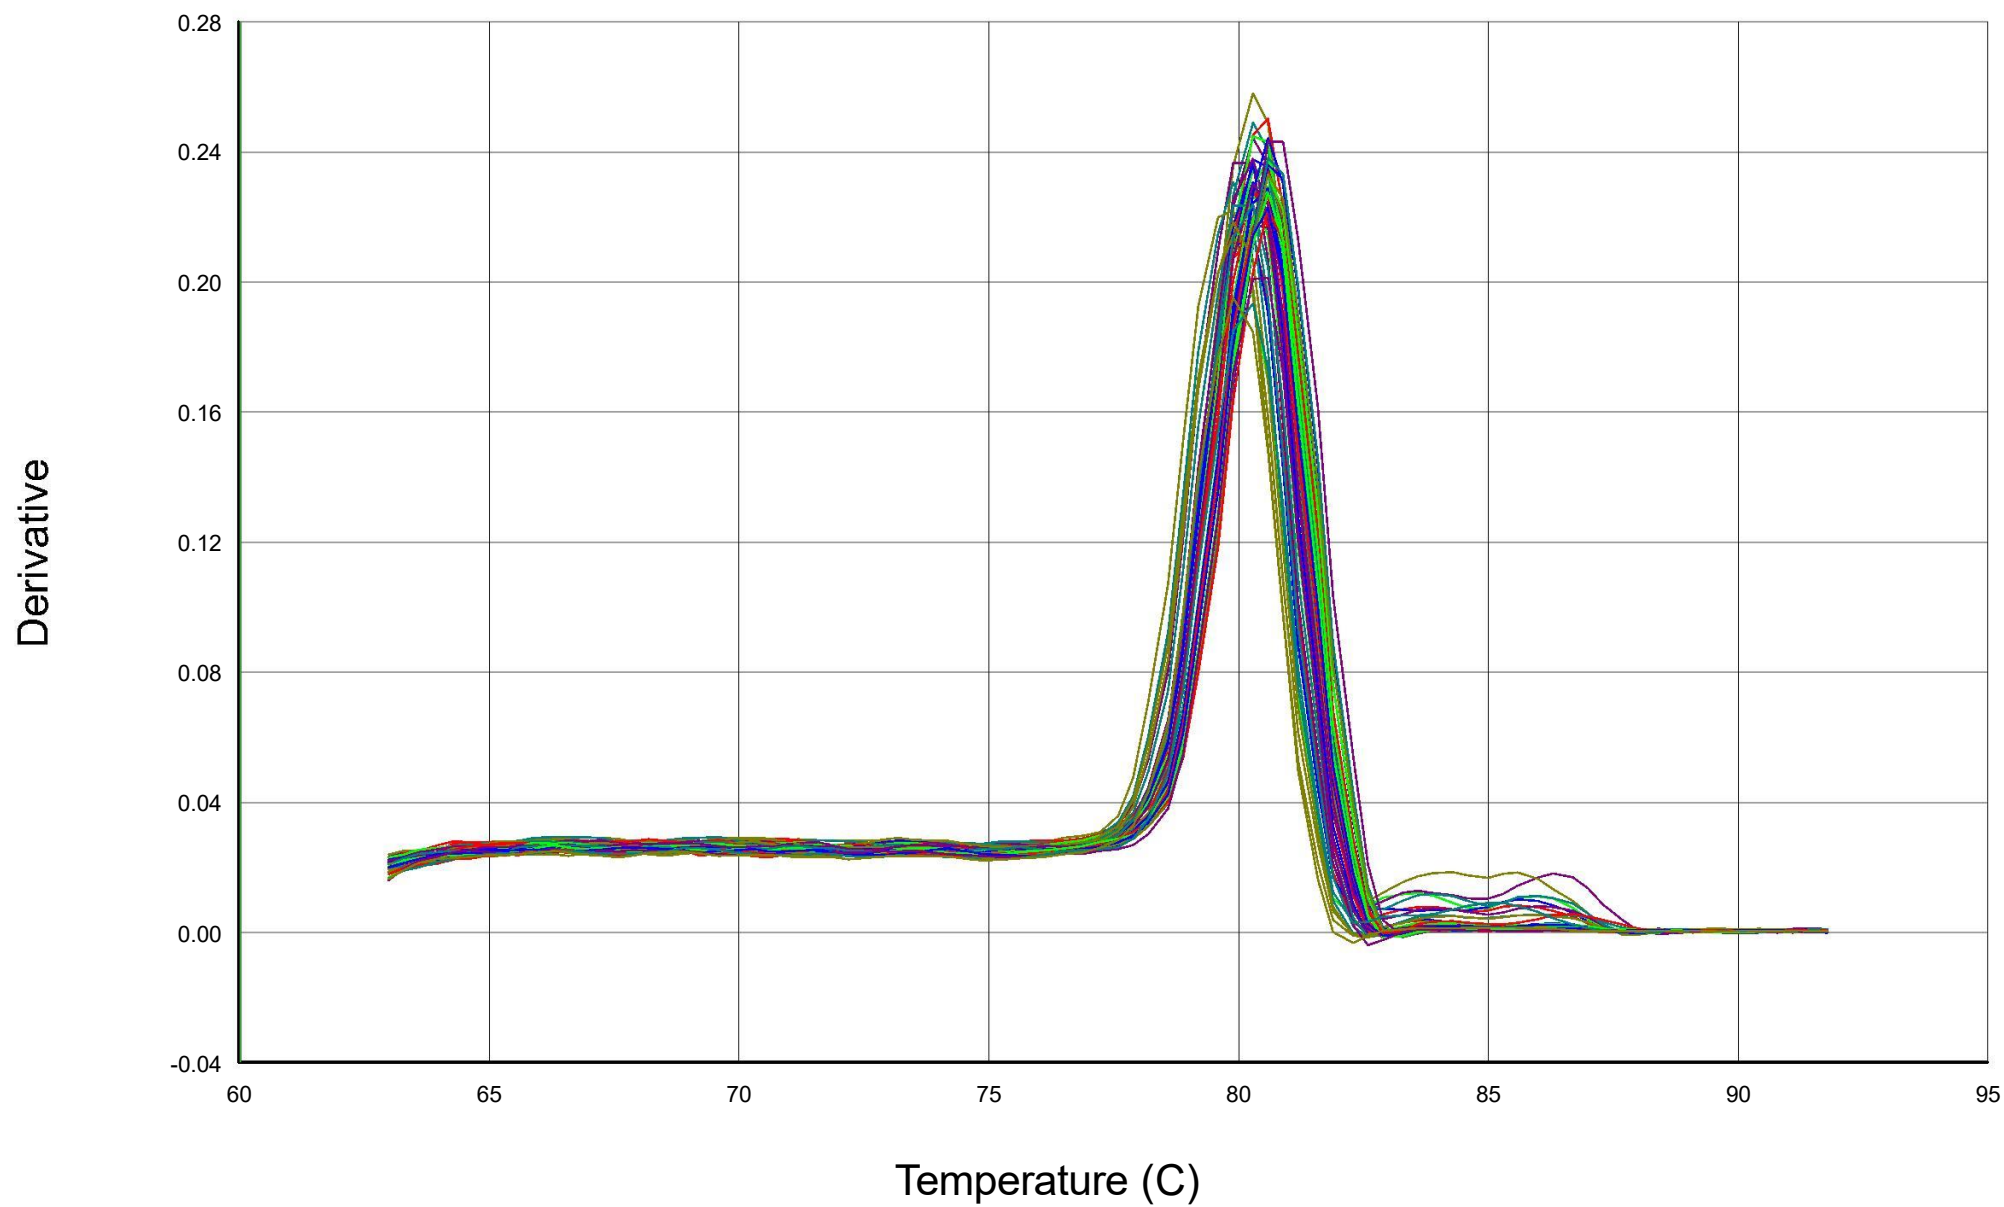

Detector = ABCC2\_Chicken, T<sub>m</sub> = 60.0 °C

Well(s): A1-D12

Document: I\_ABCC2\_plate 2 (Absolute Quantification)

## Dissociation Curve

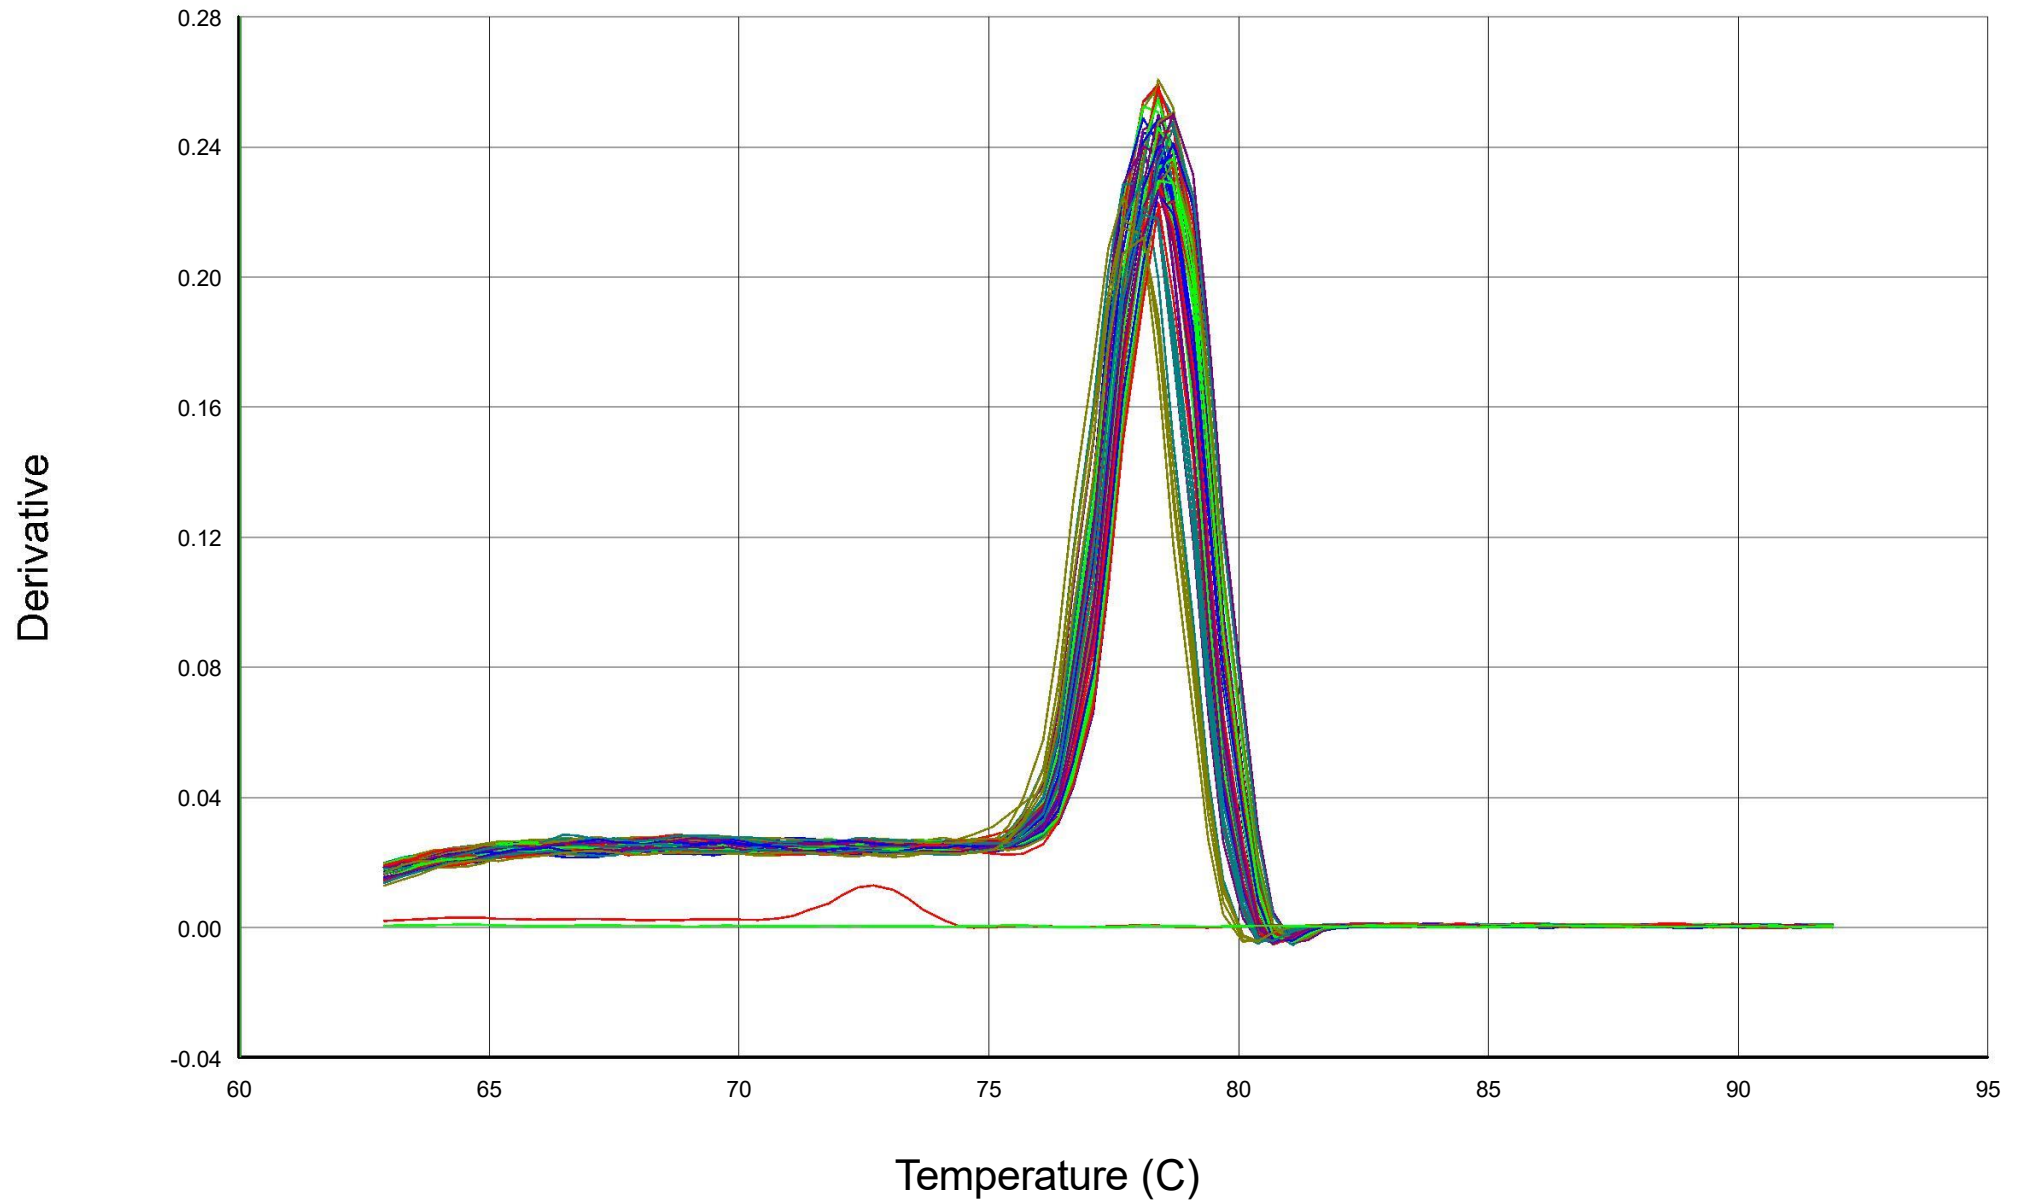

Detector = ABCG2\_Chicken, Tm = 60.0 °C

Well(s): A1-D12,H8-H9

Document: I\_ABCG2\_plate 1 (Absolute Quantification)

## Dissociation Curve

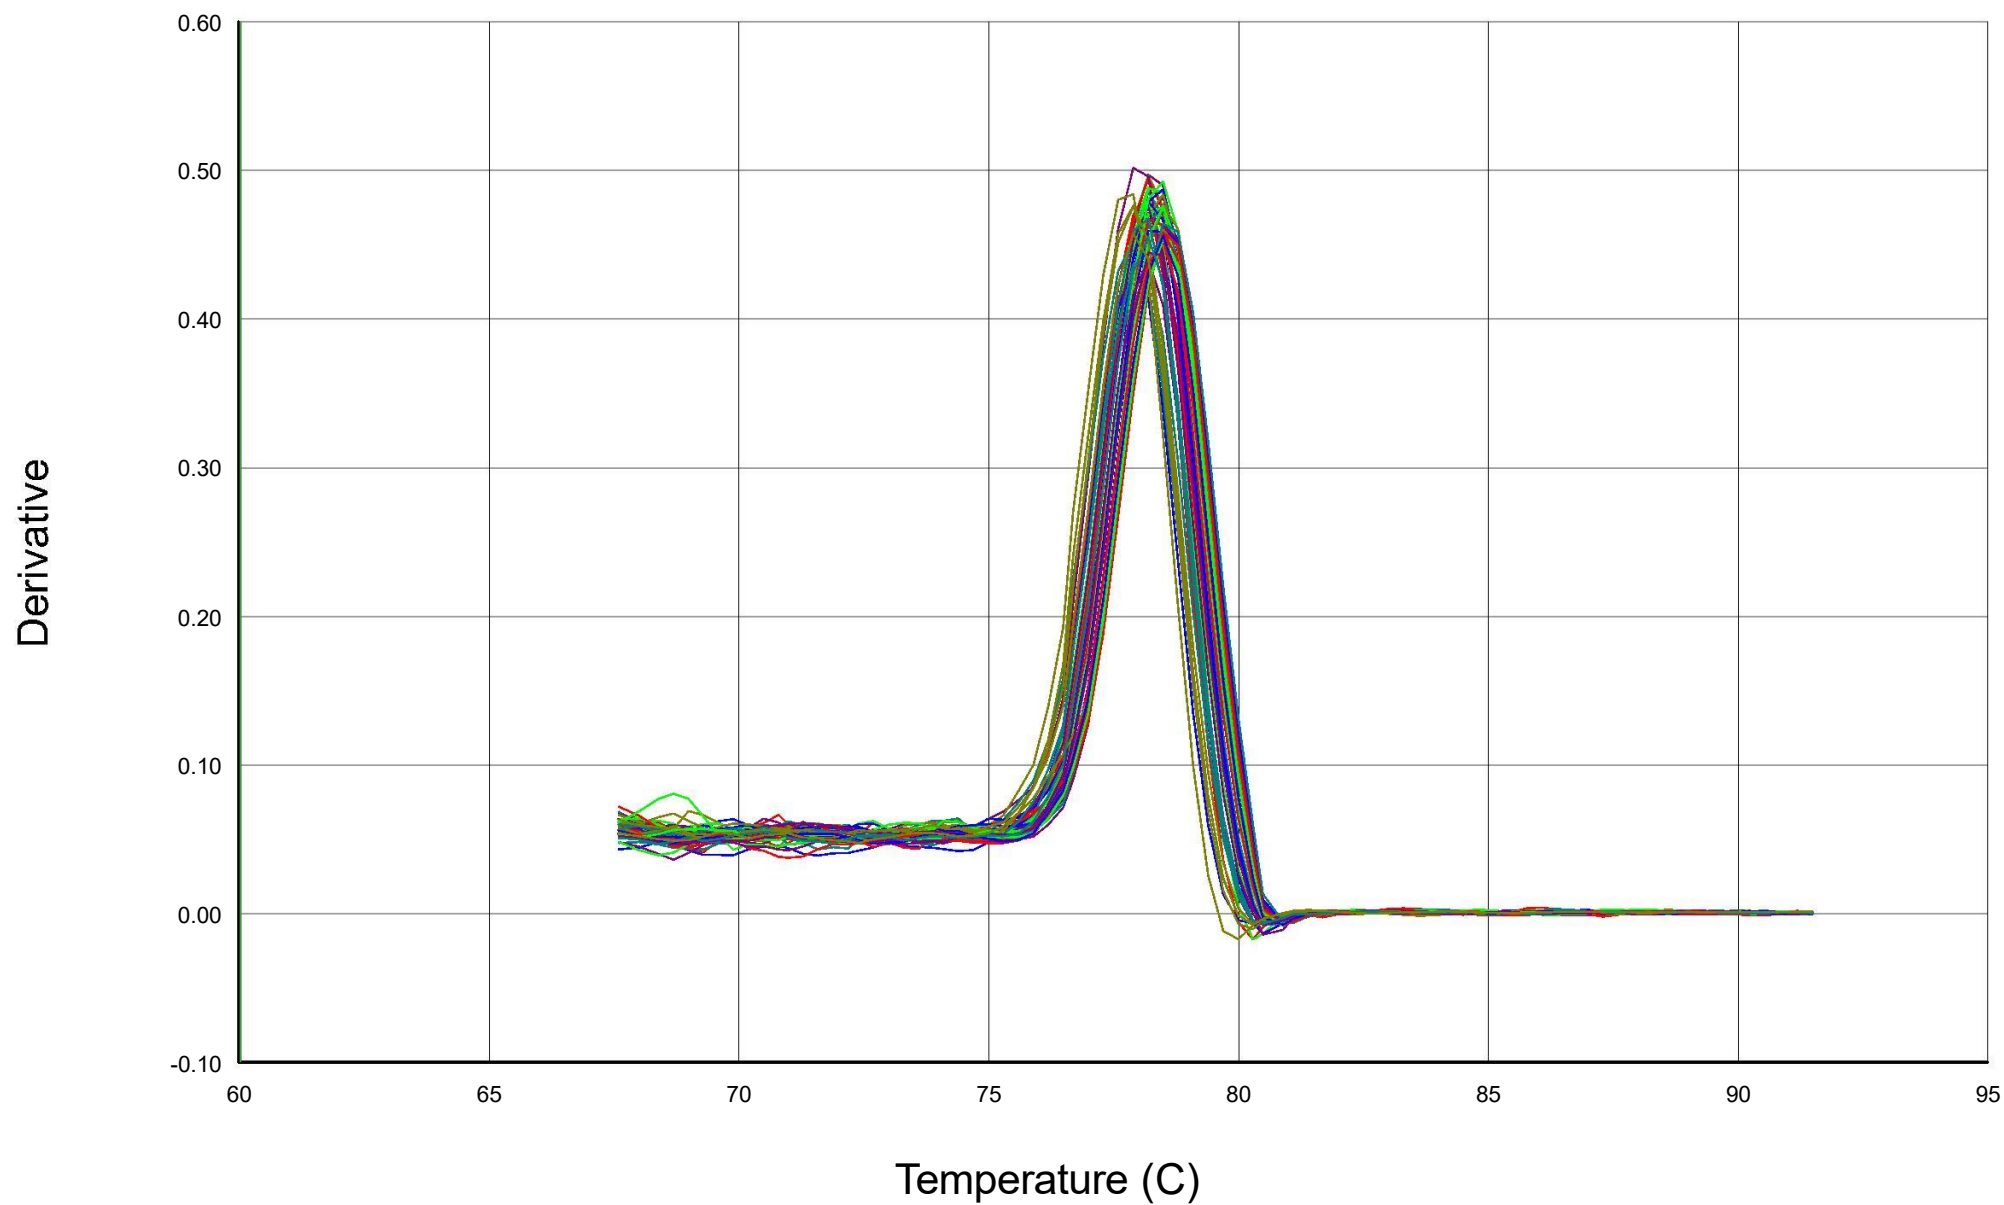

Detector = ABCG2, Tm = 60.0 °C

Well(s): A1-D12

Document: I\_ABCG2\_plate 2 (Absolute Quantification)

## Dissociation Curve

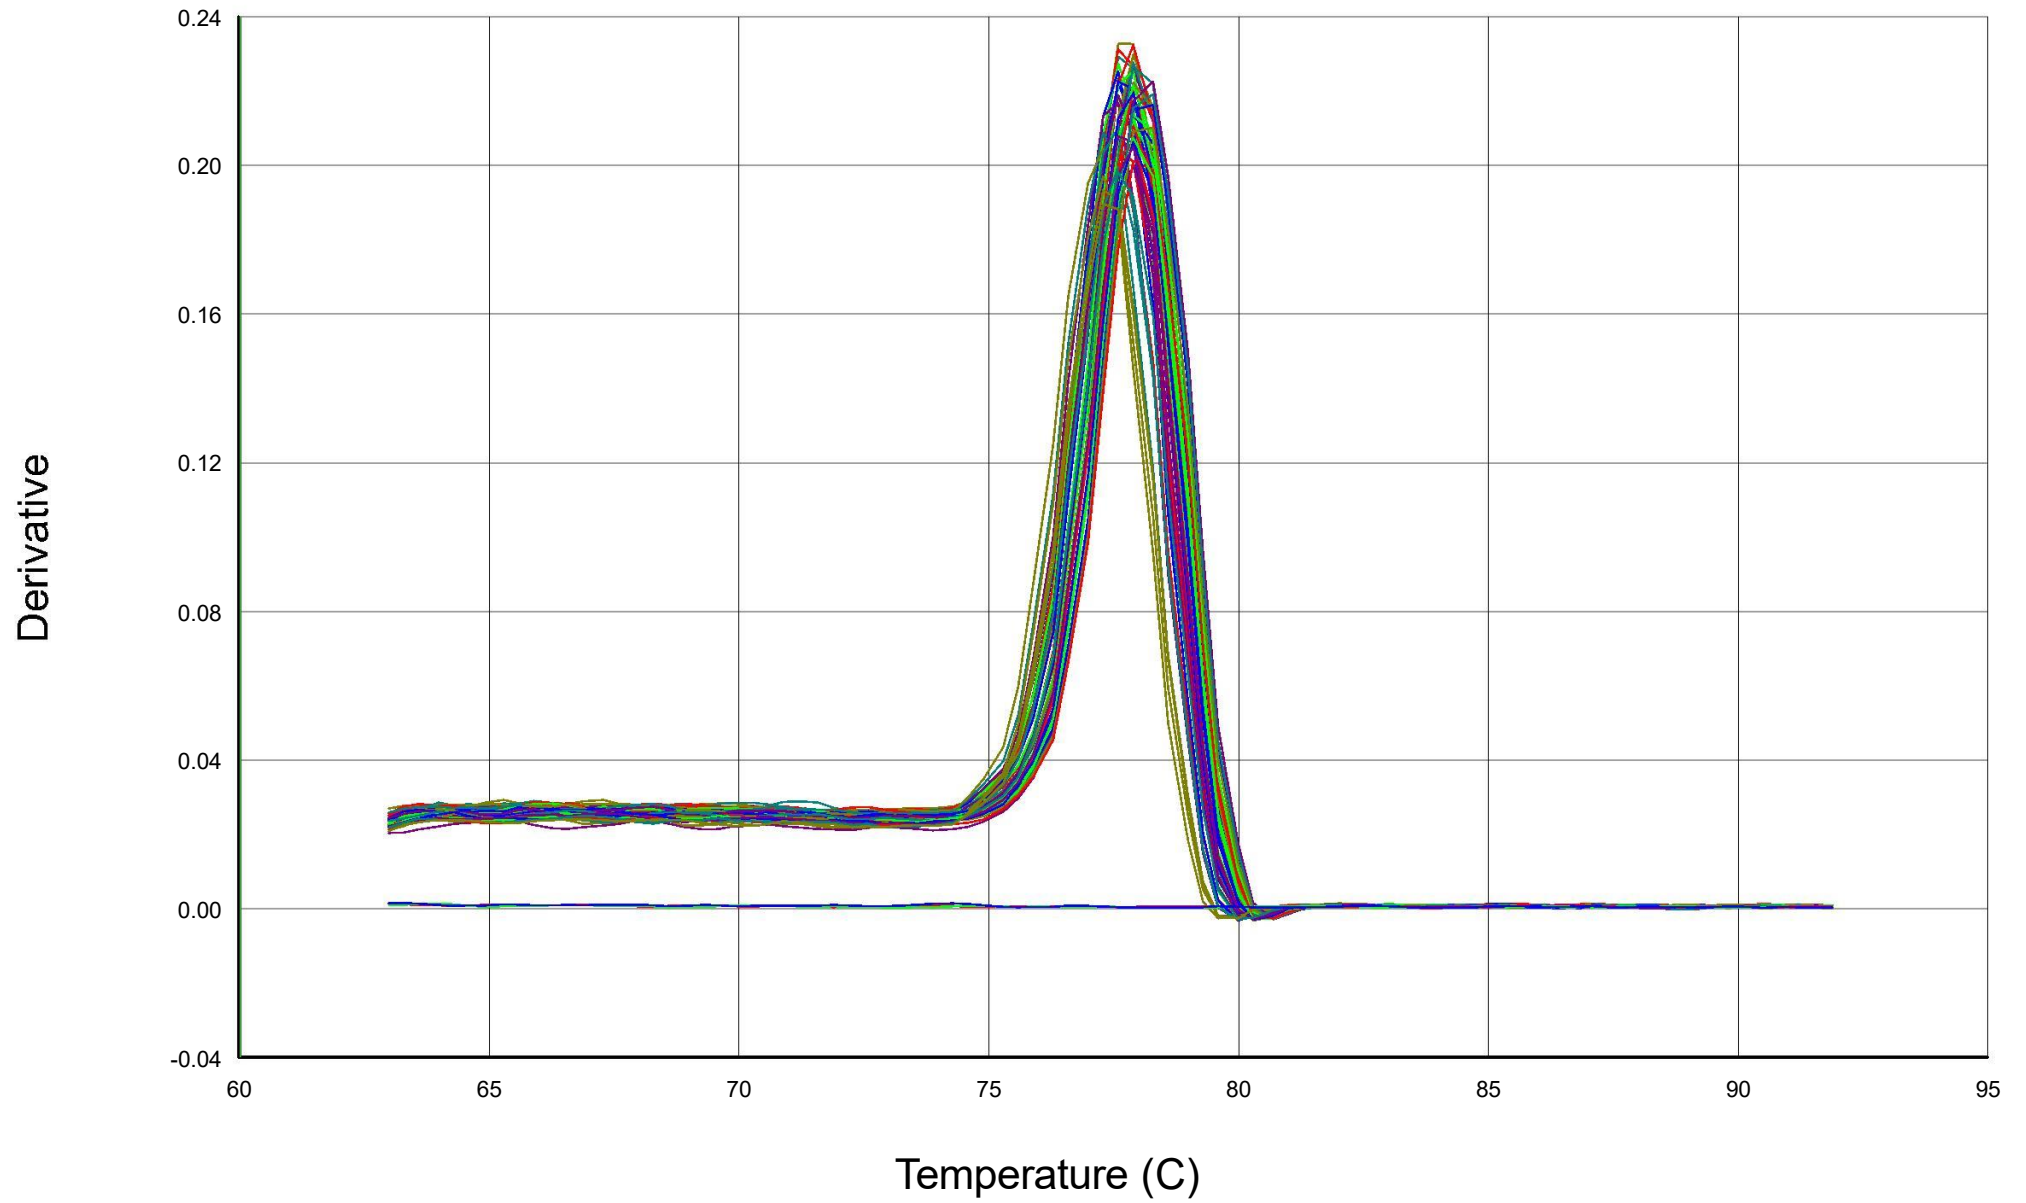

Detector = GUSB\_chicken, T<sub>m</sub> = 60.0 °C

Well(s): A1-D12,H7-H9

Document: I\_GUSB\_plate 1 (Absolute Quantification)

## Dissociation Curve

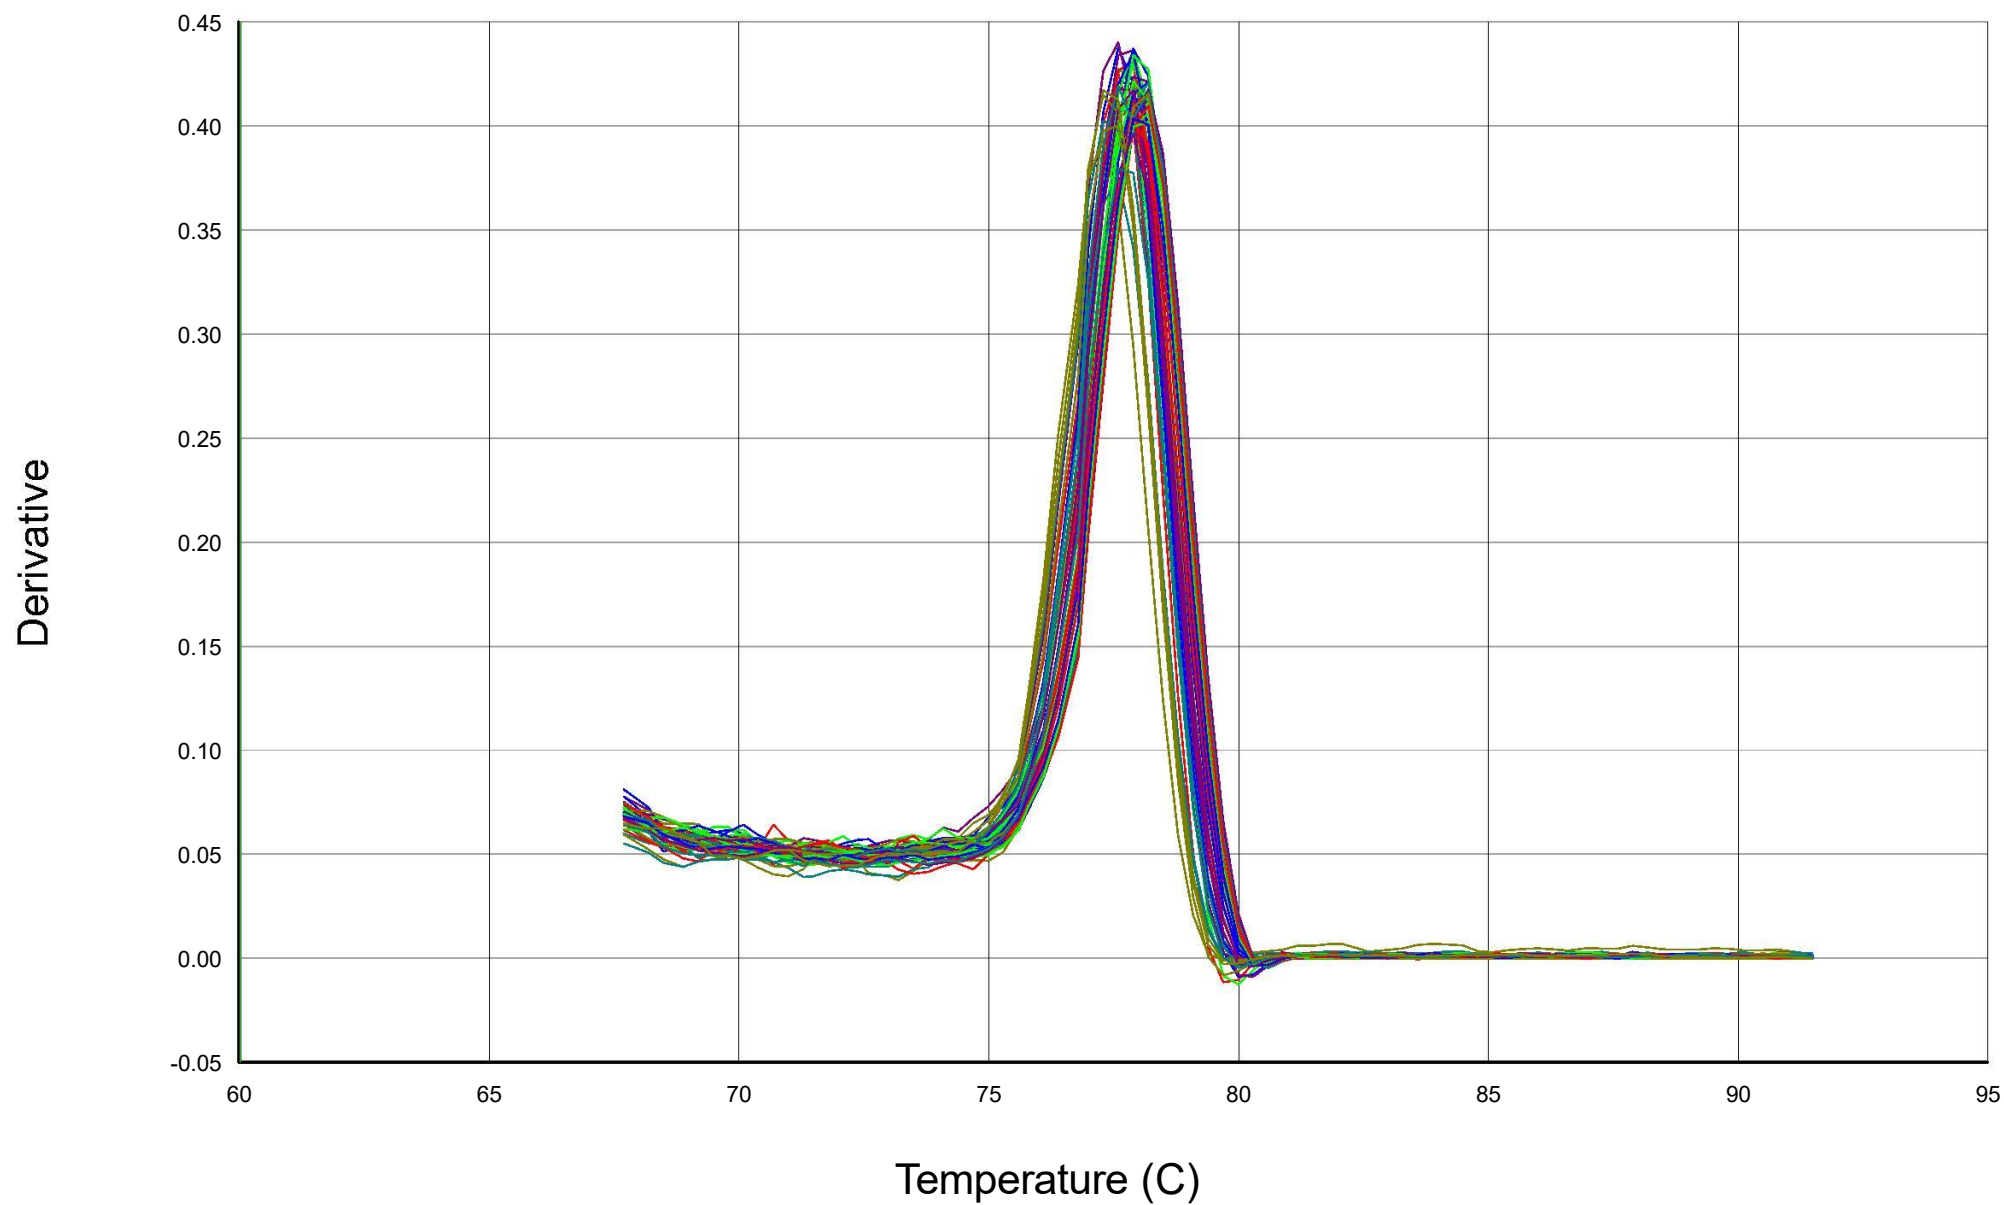

Detector = GUSB\_Chicken, T<sub>m</sub> = 60.0 °C

Well(s): A1-D12

Document: I\_GUSB\_plate 2 (Absolute Quantification)

## Dissociation Curve

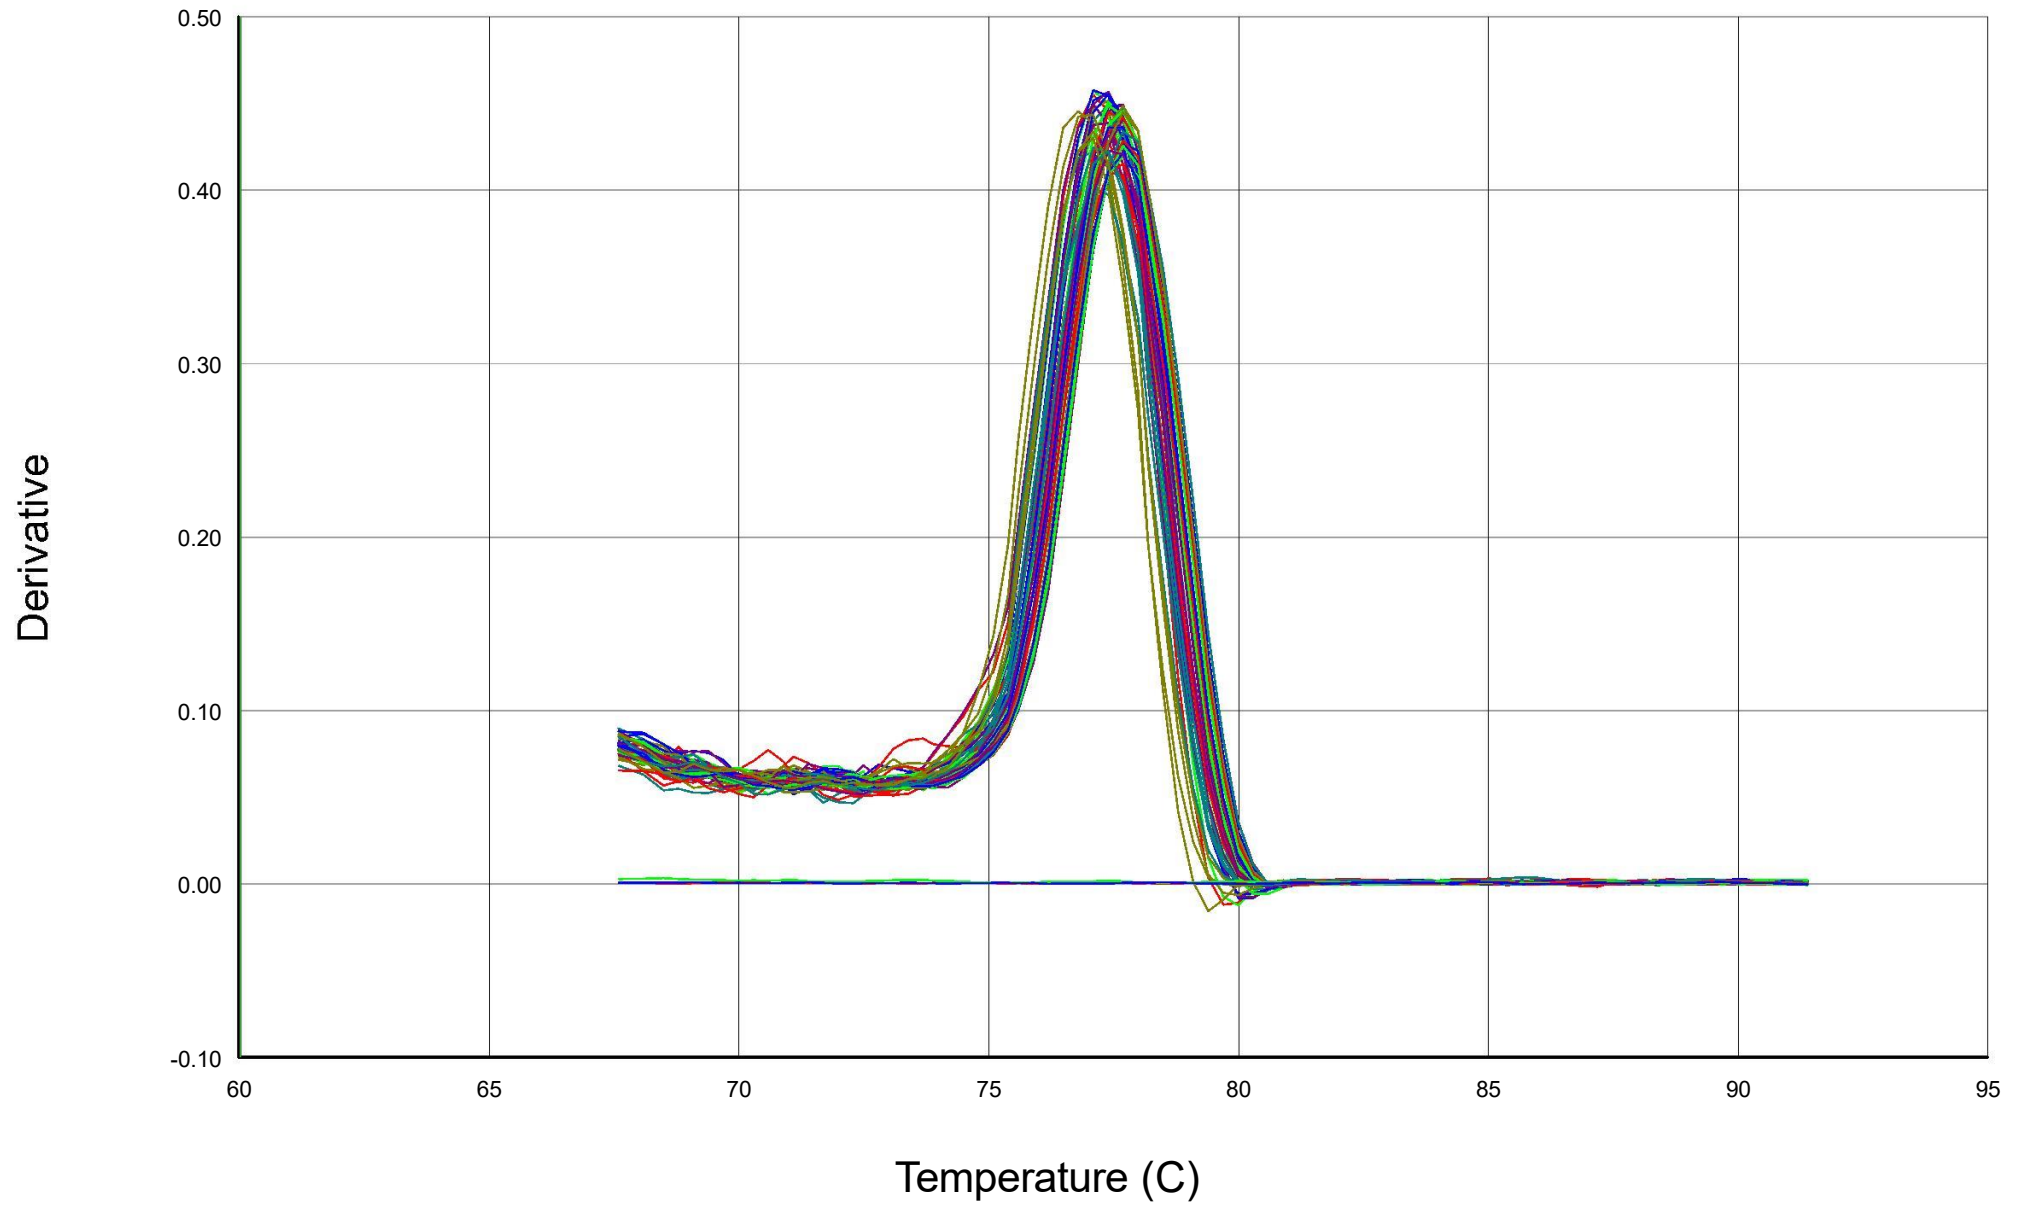

Detector = HPRT, Tm = 60.0 °C

Well(s): A1-D12,H7-H9

Document: I\_HPRT\_plate 1 (Absolute Quantification)



## Dissociation Curve

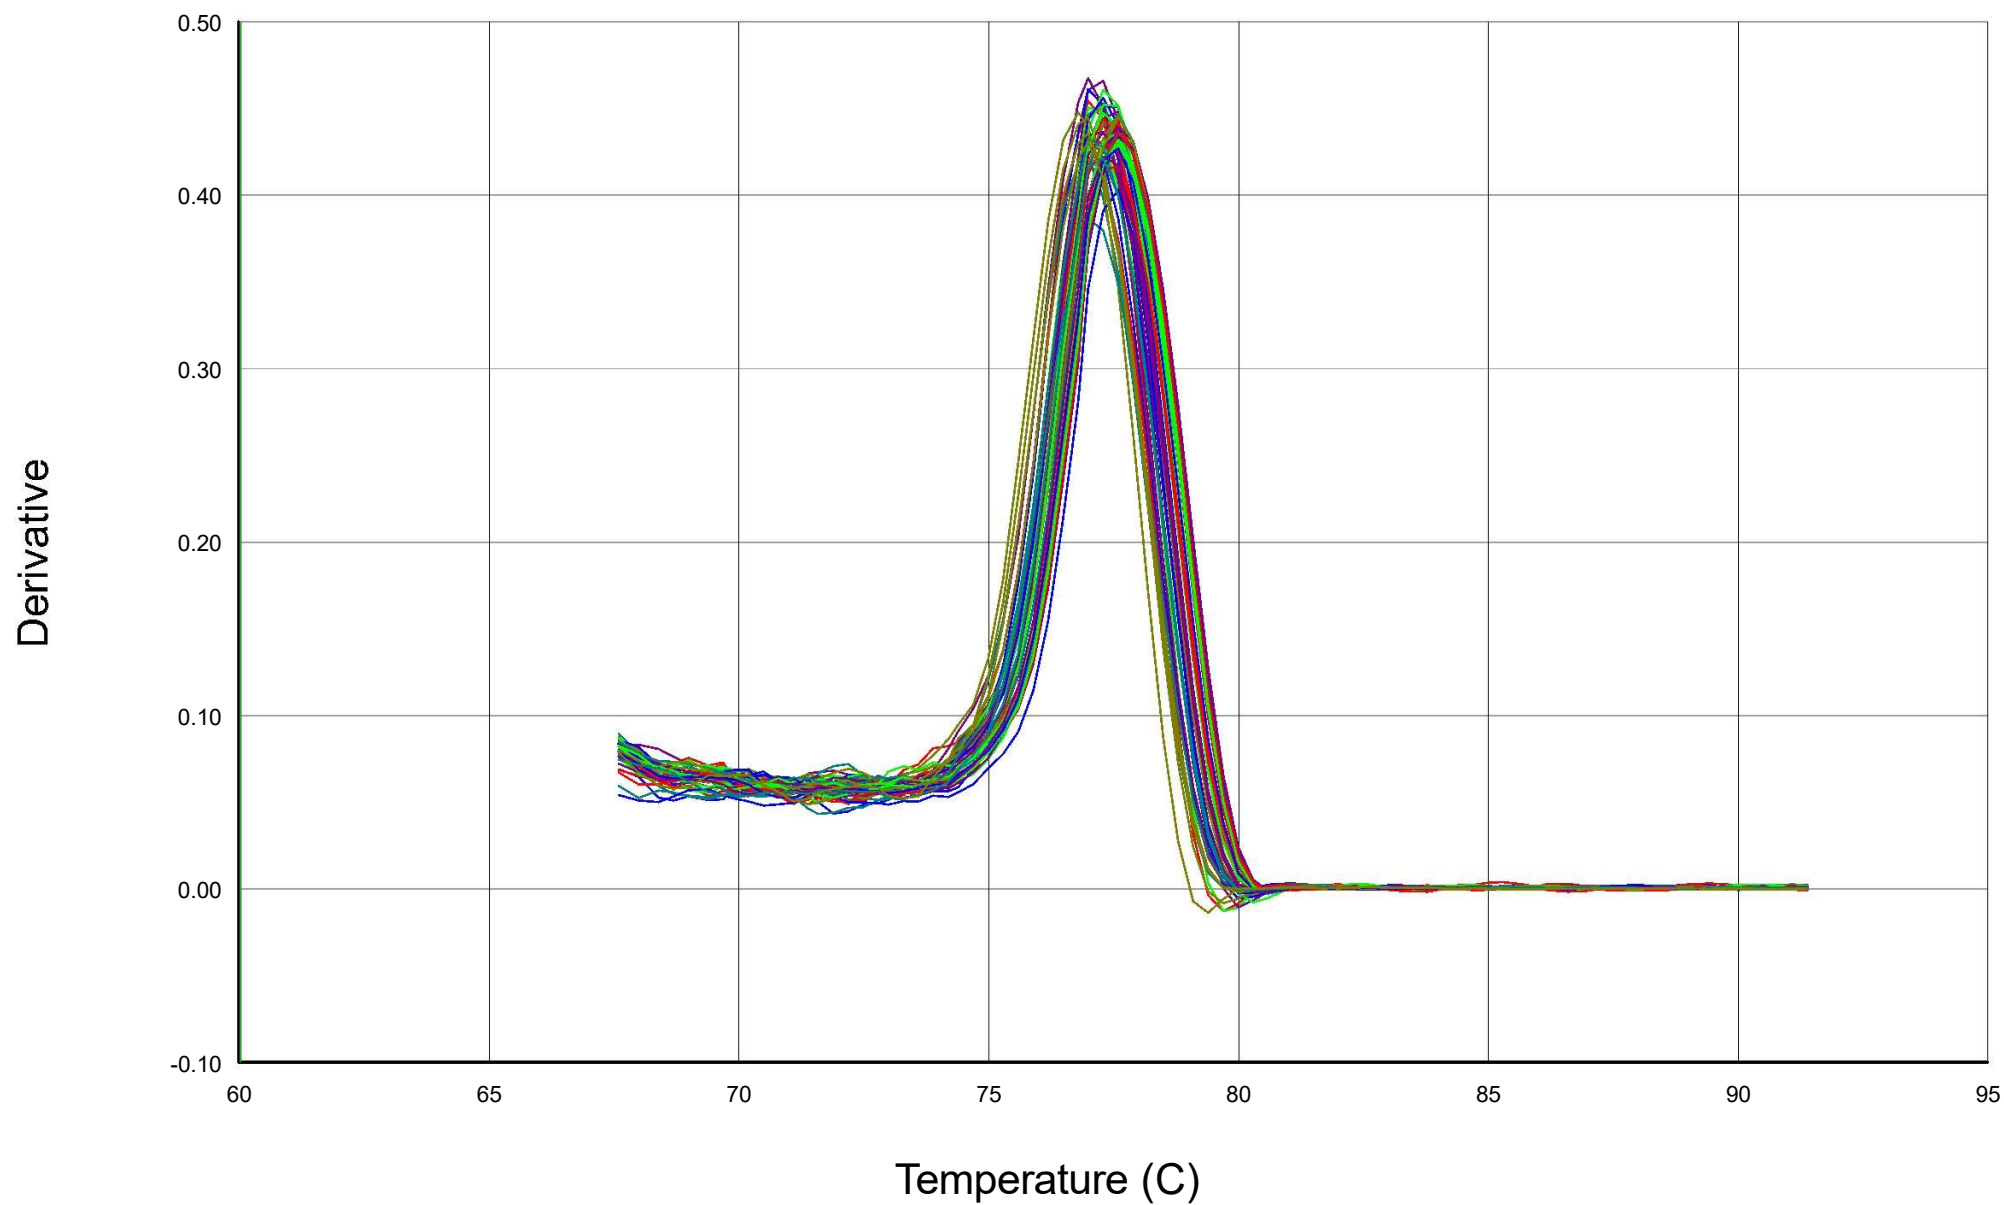

Detector = HPRT, Tm = 60.0 °C

Well(s): A1-D12

Document: I\_HPRT\_plate 2 (Absolute Quantification)
