# Supplementary material for: Turmeric Powder Counteracts Oxidative Stress and Reduces AFB1 Content in the Liver of Broilers Exposed to the EU Maximum Levels of the Mycotoxin
Source: MDPI journal article supplement (doi:10.3390/toxins15120687), 2023-12-07

**Figure S2.** HPLC-FLD chromatograms of AF obtained using the analytical conditions detailed in the par. 5.6.3. The red chromatogram represents a standard calibrant of AF, the green and blue chromatograms are those of liver samples belonging to the AFB1 group and AFB1 plus TP group, respectively.

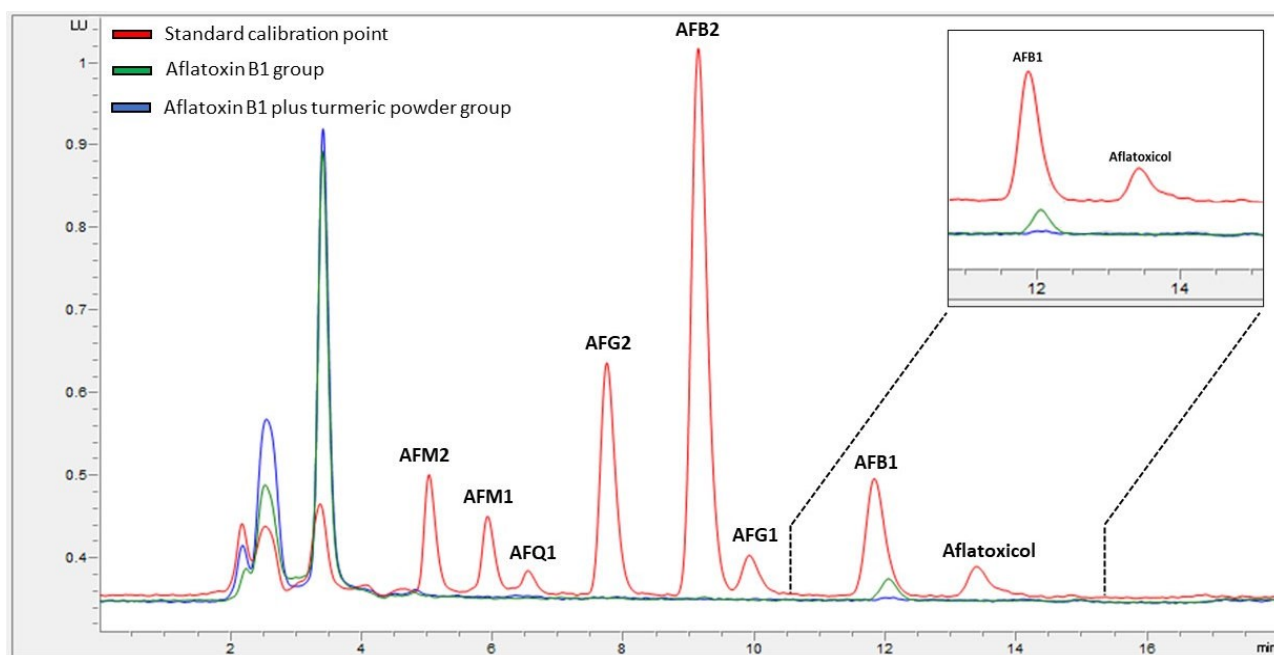

Supplement: s1 [file s1]
